# Supplementary material for: On the supramolecular properties of neutral, anionic and cationic cadmium complexes harvested from dithiolate–polyamine binary ligand systems
Source: Royal Society of Chemistry journal article supplement (doi:10.1039/d0ce01233e), 2020-01-01
Supplement: d0ce01233e1.pdf [file d0ce01233e1.pdf]

## ***Electronic Supplementary Information for CrystEngComm***

### **On the Supramolecular Properties of Neutral, Anionic and Cationic Cadmium Complexes Harvested from Dithiolate-Polyamine Binary Ligand Systems**

Suman Adhikari<sup>a\*</sup>, Tirtha Bhattacharjee<sup>b</sup>, Arijit Das<sup>c</sup>, Subhadip Roy<sup>d</sup>, Constantin Gabriel Daniliuc<sup>e</sup>, Jan K. Zaręba<sup>f</sup>, Antonio Bauzá<sup>g</sup>, Antonio Frontera<sup>g\*</sup>

<sup>a</sup> *Department of Chemistry, Govt. Degree College, Dharmanagar, Tripura (N)-799253, India*

<sup>b</sup> *Department of Chemistry, Bineswar Brahma Engineering College, Kokrajhar-783370, Assam, India*

<sup>c</sup> *Department of Chemistry, Bir Bikram Memorial College, Agartala, Tripura (W), India*

<sup>d</sup> *Department of Chemistry, The ICFAI University Tripura, Agartala-799210, Tripura, India*

<sup>e</sup> *Organisch-Chemisches Institut, Westfälische Wilhelms-Universität Münster, Corrensstraße 40, D-48149, Germany, Münster*

<sup>f</sup> *Advanced Materials Engineering and Modelling Group, Wrocław University of Science and Technology, Wybrzeże Wyspiańskiego 27, 50-370 Wrocław, Poland*

<sup>g</sup> *Department de Química, Universitat de les Illes Balears, Crta. de Valldemossa km 7.5, 07122 Palma de Mallorca (Balears), Spain*

\* Corresponding author address: Department of Chemistry, Govt. Degree College, Dharmanagar, Tripura (N)-799253, India (S. Adhikari). Departament de Química, Universitat de les Illes Balears, Crta. de Valldemossa km 7.5, 07122 Palma de Mallorca (Balears), Spain (A. Frontera).

*E-mail addresses: [sumanadhi@gmail.com](mailto:sumanadhi@gmail.com) (S. Adhikari); [toni.frontera@uib.es](mailto:toni.frontera@uib.es) (A. Frontera).*

## Table of Contents:

1. X-ray crystal structure analysis of **1**
2. X-ray crystal structure analysis of **2**
3. X-ray crystal structure analysis of **3**
4. **Figure S1.** FT-IR spectrum of  $[Cd(i-mnt)(DMSO)_2]_n$  (**1**)
5. **Figure S2.** FT-IR spectrum of  $\{[Cd(i-mnt)pn].2H_2O\}$  (**2**)
6. **Figure S3.** FT-IR spectrum of  $[Cd(i-mnt)_3][Cd(tren)_2]_2$  (**3**)
7. **Figure S4.**  $^1H$  NMR spectrum of  $\{[Cd(i-mnt)pn].2H_2O\}$  (**2**) in  $dms\text{-}d_6$
8. **Figure S5.**  $^1H$  NMR spectrum of  $[Cd(i-mnt)_3][Cd(tren)_2]_2$  (**3**) in  $dms\text{-}d_6$
9. **Figure S6.** Coordination polyhedron of Cd(II) in  $[Cd(i-mnt)(DMSO)_2]_n$  (**1**)
10. **Figure S7.** Polyhedral view of the unit cell packing for  $\{[Cd(i-mnt)pn].2H_2O\}$  (**2**) comprising of four discrete molecules.
11. **Figure S8.** Graph-set motifs in  $[Cd(i-mnt)_3][Cd(tren)_2]_2$  (**3**) comprising of four discrete molecules.
12. **Figure S9.** Decomposed fingerprint plots of complex molecule in **2**.
13. **Figure S10.** Decomposed fingerprint plots of **3A**.
14. **Figure S11.** Decomposed fingerprint plots of **3B**.
15. **Figure S12.** Decomposed fingerprint plots of **3C**.
16. **Table S1.** Crystal data and structure refinement for **1-3**
17. **Table S2.** Bond lengths (Å) for **1-3**
18. **Table S3.** Bond angles ( $^\circ$ ) for **1-3**
19. **Table S4.** Torsion angles ( $^\circ$ ) of **1-3**
20. **Table S5.** Hydrogen bond geometry for **1-3**.
21. **Table S6.** Summary of Shape analysis for **2** and **3**.

### ***X-ray crystal structure collection and refinement details 1:***

A yellow plate-like specimen of  $C_8H_{12}CdN_2O_2S_4$ , approximate dimensions 0.050 mm x 0.120 mm x 0.140 mm, was used for the X-ray crystallographic analysis. The X-ray intensity data were measured. A total of 1763 frames were collected. The total exposure time was 17.12 hours. The frames were integrated with the Bruker SAINT software package using a wide-frame algorithm. The integration of the data using an orthorhombic unit cell yielded a total of 24854 reflections to a maximum  $\theta$  angle of  $66.85^\circ$  (0.84 Å resolution), of which 1411 were independent (average redundancy 17.614, completeness = 99.2%,  $R_{int} = 5.75\%$ ,  $R_{sig} = 2.31\%$ ) and 1388 (98.37%) were greater than  $2\sigma(F^2)$ . The final cell constants of  $a = 13.1254(6)$  Å,  $b = 13.6595(6)$  Å,  $c = 8.5225(4)$  Å, volume =  $1527.97(12)$  Å<sup>3</sup>, are based upon the refinement of the XYZ-centroids of 9933 reflections above  $20\sigma(I)$  with  $12.24^\circ < 2\theta < 133.4^\circ$ . Data were corrected for absorption effects using the multi-scan method (SADABS). The ratio of minimum to maximum apparent transmission was 0.857. The calculated minimum and maximum transmission coefficients (based on crystal size) are 0.2060 and 0.4920. The structure was solved and refined using the Bruker SHELXTL Software Package, using the space group *Pnma*, with  $Z = 4$  for the formula unit,  $C_8H_{12}CdN_2O_2S_4$ . The final anisotropic full-matrix least-squares refinement on  $F^2$  with 137 variables converged at  $R1 = 3.26\%$ , for the observed data and  $wR2 = 7.59\%$  for all data. The goodness-of-fit was 1.244. The largest peak in the final difference electron density synthesis was  $0.700 e^-/\text{Å}^3$  and the largest hole was  $-0.741 e^-/\text{Å}^3$  with an RMS deviation of  $0.119 e^-/\text{Å}^3$ . On the basis of the final model, the calculated density was  $1.777 \text{ g/cm}^3$  and  $F(000)$ , 808  $e^-$ . CCDC number: 1990304.

### ***X-ray crystal structure collection and refinement details of 2:***

A colorless plate-like specimen of  $C_{10}H_{22}CdN_6OS_2$ , approximate dimensions 0.020 mm x 0.060 mm x 0.180 mm, was used for the X-ray crystallographic analysis. The X-ray intensity data were measured. A total of 1571 frames were collected. The total exposure time was 17.85 hours. The frames were integrated with the Bruker SAINT software package using a wide-frame algorithm. The integration of the data using a monoclinic unit cell yielded a total of 27384 reflections to a maximum  $\theta$  angle of  $66.76^\circ$  (0.84 Å resolution), of which 2973 were independent (average redundancy 9.211, completeness = 99.7%,  $R_{int} = 4.39\%$ ,  $R_{sig} = 2.27\%$ ) and 2839 (95.49%) were

greater than  $2\sigma(F^2)$ . The final cell constants of  $\underline{a} = 9.7864(5) \text{ \AA}$ ,  $\underline{b} = 10.9611(6) \text{ \AA}$ ,  $\underline{c} = 16.0220(8) \text{ \AA}$ ,  $\beta = 102.095(2)^\circ$ , volume =  $1680.52(15) \text{ \AA}^3$ , are based upon the refinement of the XYZ-centroids of 9942 reflections above  $20 \sigma(I)$  with  $9.769^\circ < 2\theta < 133.4^\circ$ . Data were corrected for absorption effects using the multi-scan method (SADABS). The ratio of minimum to maximum apparent transmission was 0.658. The calculated minimum and maximum transmission coefficients (based on crystal size) are 0.2070 and 0.7840. The structure was solved and refined using the Bruker SHELXTL Software Package, using the space group  $P2_1/n$ , with  $Z = 4$  for the formula unit,  $C_{10}H_{22}CdN_6OS_2$ . The final anisotropic full-matrix least-squares refinement on  $F^2$  with 239 variables converged at  $R1 = 1.96\%$ , for the observed data and  $wR2 = 4.58\%$  for all data. The goodness-of-fit was 1.035. The largest peak in the final difference electron density synthesis was  $0.416 \text{ e}/\text{\AA}^3$  and the largest hole was  $-0.322 \text{ e}/\text{\AA}^3$  with an RMS deviation of  $0.067 \text{ e}/\text{\AA}^3$ . On the basis of the final model, the calculated density was  $1.655 \text{ g}/\text{cm}^3$  and  $F(000)$ , 848 e<sup>-</sup>. The hydrogen atoms at N3, N4, N5 and N6 were refined freely. The hydrogen atoms at O1 were refined freely, but with O-H distance restraints (DFIX and U-fixed value). CCDC number: 1990305.

### ***X-ray crystal structure collection and refinement details of 3:***

A yellow prism-like specimen of  $C_{28}H_{52}Cd_3N_{18}S_6$ , approximate dimensions  $0.099 \text{ mm} \times 0.108 \text{ mm} \times 0.126 \text{ mm}$ , was used for the X-ray crystallographic analysis. The X-ray intensity data were measured. A total of 798 frames were collected. The total exposure time was 4.30 hours. The frames were integrated with the Bruker SAINT software package using a narrow-frame algorithm. The integration of the data using an orthorhombic unit cell yielded a total of 40692 reflections to a maximum  $\theta$  angle of  $72.44^\circ$  ( $0.81 \text{ \AA}$  resolution), of which 8919 were independent (average redundancy 4.562, completeness = 99.8%,  $R_{\text{int}} = 7.46\%$ ,  $R_{\text{sig}} = 4.27\%$ ) and 8399 (94.17%) were greater than  $2\sigma(F^2)$ . The final cell constants of  $\underline{a} = 14.6814(3) \text{ \AA}$ ,  $\underline{b} = 17.4409(4) \text{ \AA}$ ,  $\underline{c} = 17.6486(4) \text{ \AA}$ , volume =  $4519.04(17) \text{ \AA}^3$ , are based upon the refinement of the XYZ-centroids of 9950 reflections above  $20 \sigma(I)$  with  $7.125^\circ < 2\theta < 144.7^\circ$ . The calculated minimum and maximum transmission coefficients (based on crystal size) are 0.2680 and 0.3350. The structure was solved and refined using the Bruker SHELXTL Software Package, using the space group  $P2_12_12_1$ , with  $Z = 4$  for the formula unit,  $C_{28}H_{52}Cd_3N_{18}S_6$ . The final anisotropic full-matrix least-squares refinement on  $F^2$  with 629 variables converged at  $R1 = 3.13\%$ , for the observed data and  $wR2 = 7.29\%$  for all data. The goodness-of-fit was 1.064. The largest peak in the final

difference electron density synthesis was  $1.048 \text{ e}/\text{\AA}^3$  and the largest hole was  $-1.675 \text{ e}/\text{\AA}^3$  with an RMS deviation of  $0.107 \text{ e}/\text{\AA}^3$ . On the basis of the final model, the calculated density was  $1.720 \text{ g}/\text{cm}^3$  and  $F(000)$ , 2344 e<sup>-</sup>. Flack parameter was refined to  $-0.02(1)$ . The hydrogen's at nitrogen atoms were refined freely, but partially with N-H distance restraints (DFIX and U-fixed value). CCDC number: 1990306.

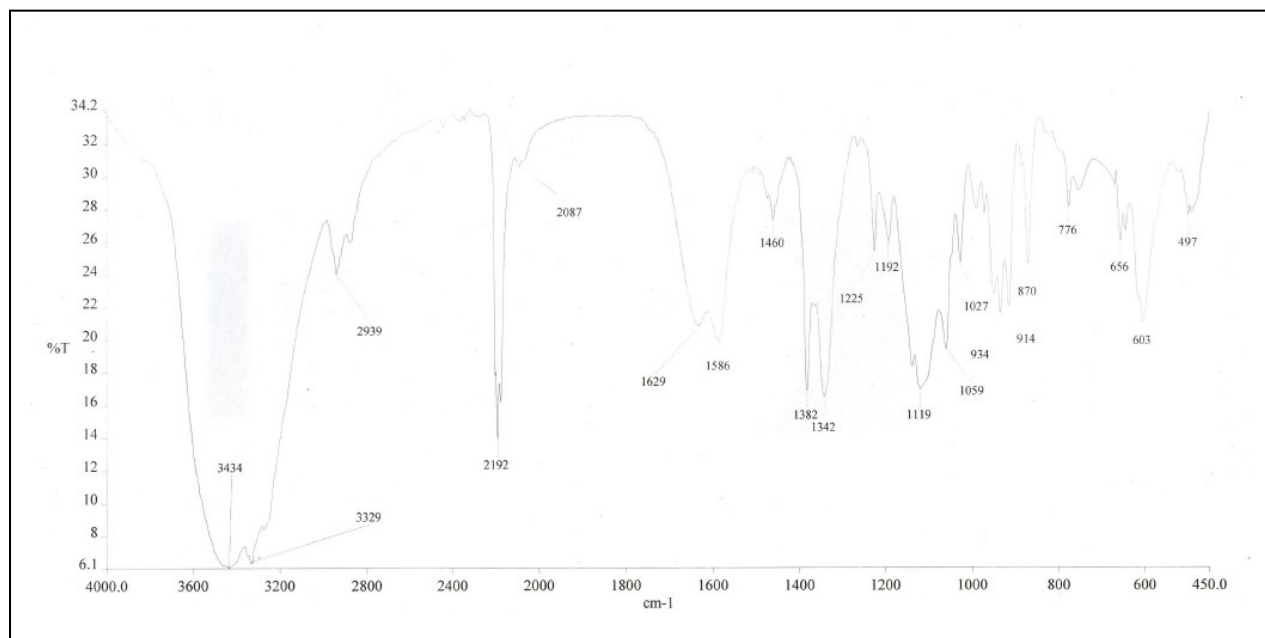

**Figure S1.** The FT-IR spectrum of complex 1



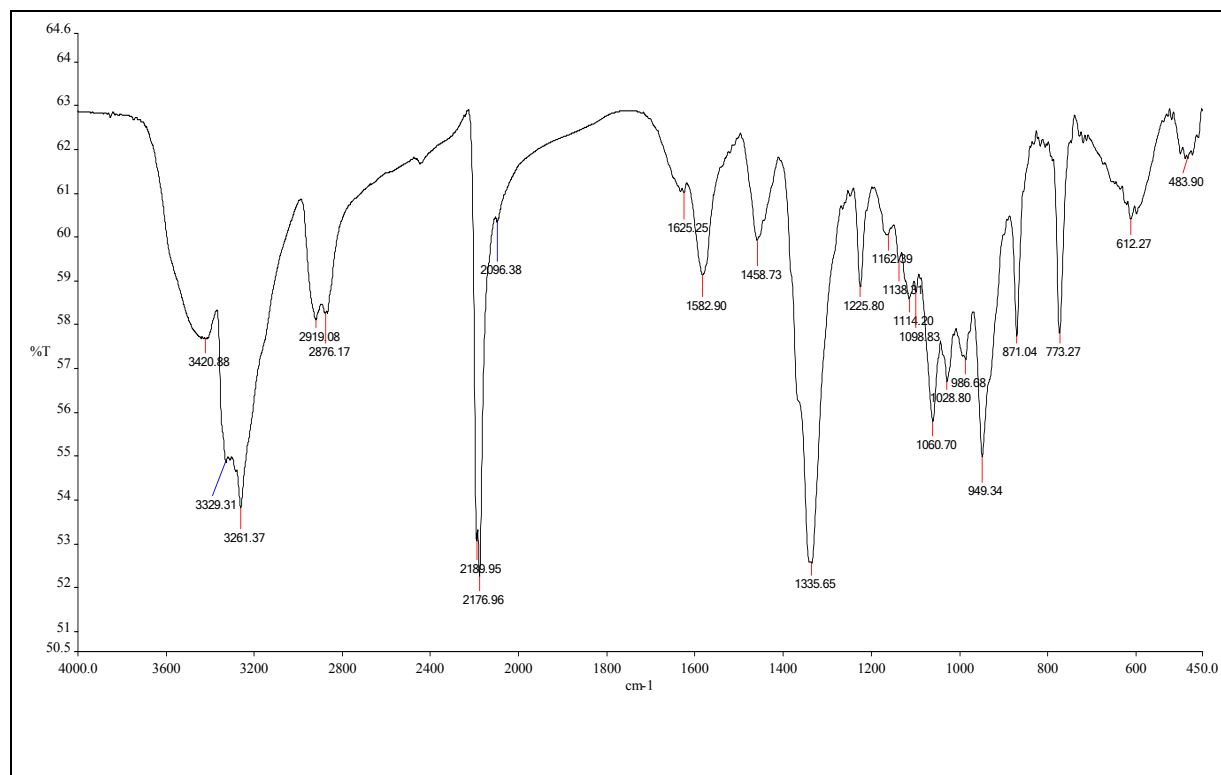

**Figure S3.** The FT-IR spectrum of complex **3**

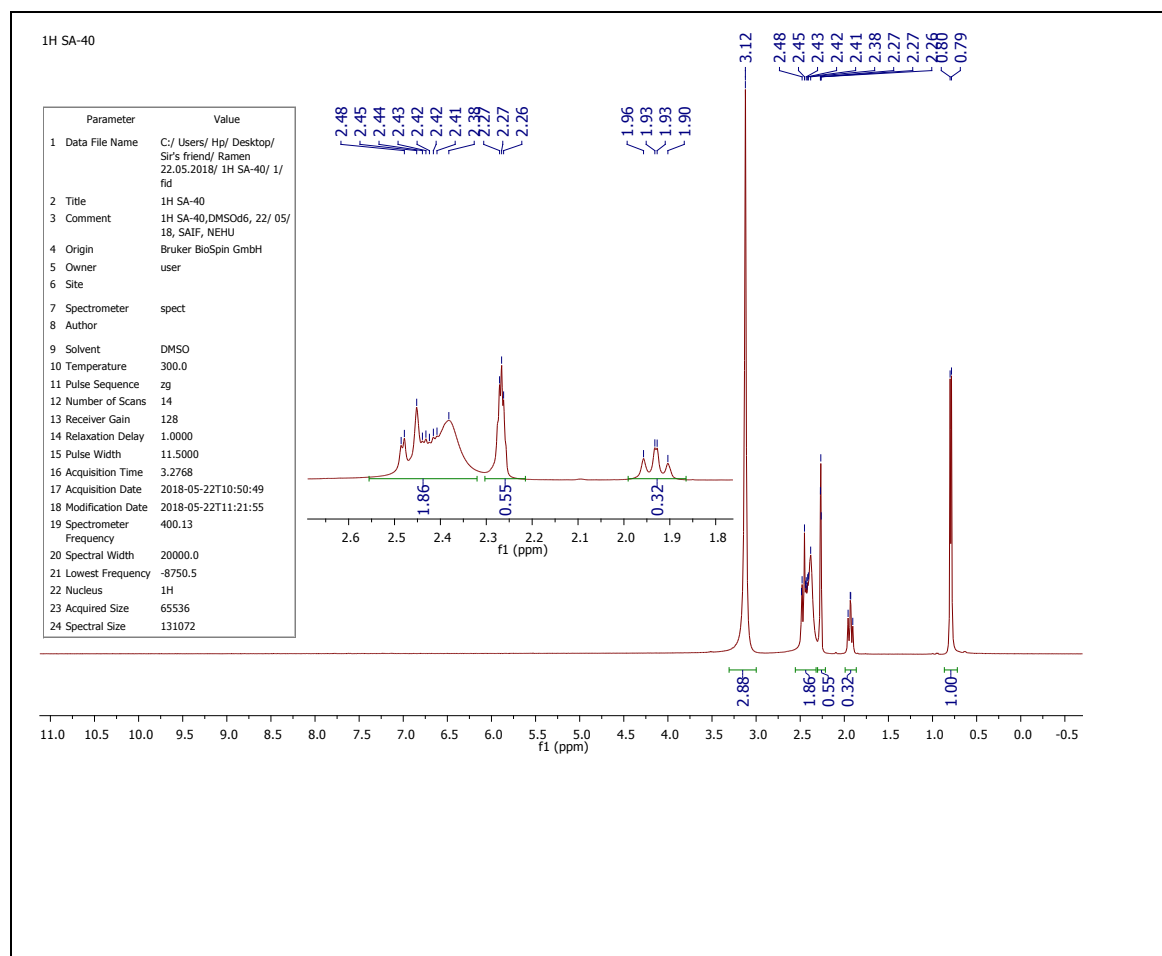

**Figure S4.**  $^1\text{H}$  NMR spectrum of **2** in  $\text{DMSO-}d_6$



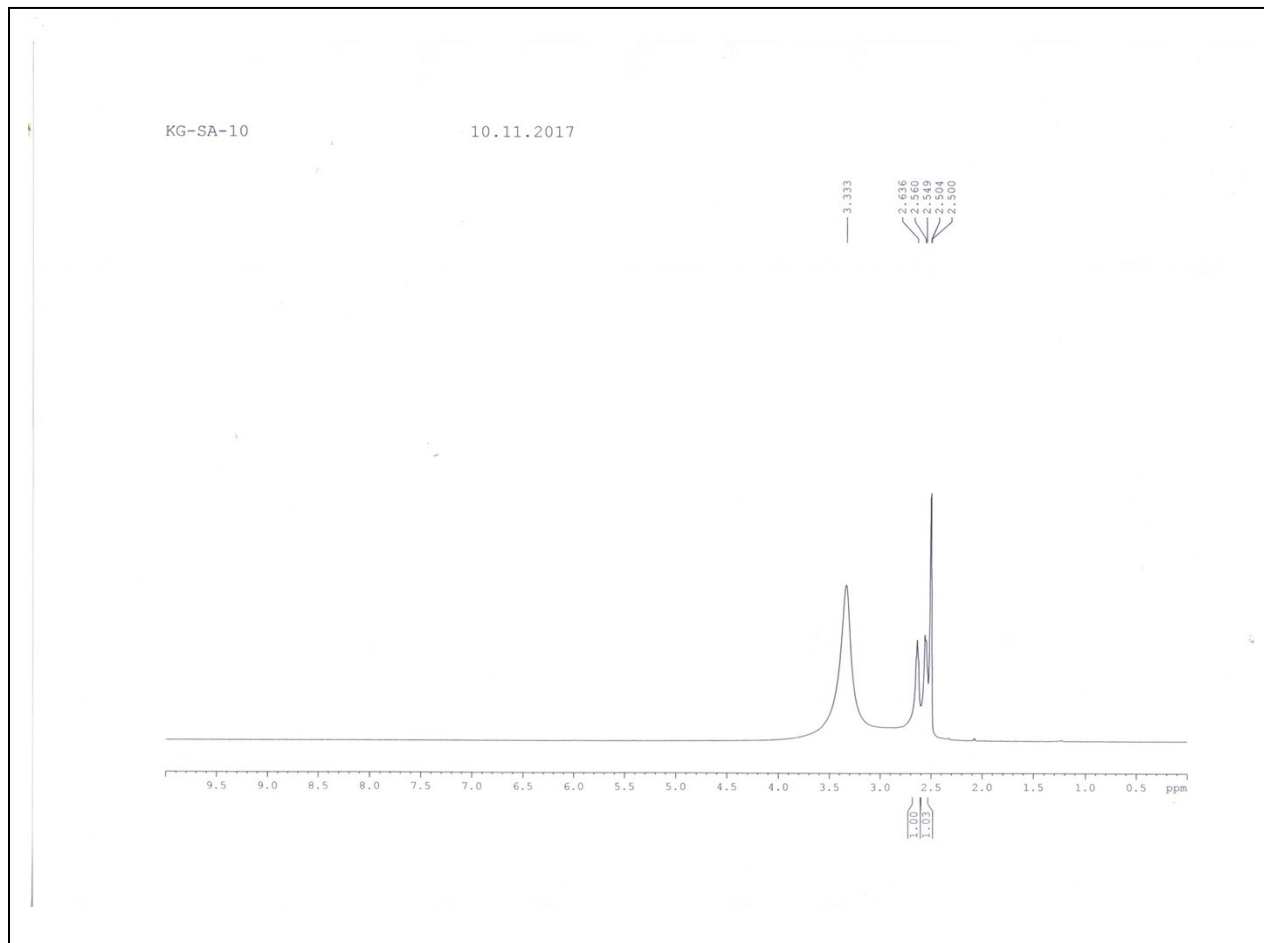

**Figure S5.**  $^1\text{H}$  NMR spectrum of **3** in  $\text{DMSO-}d_6$

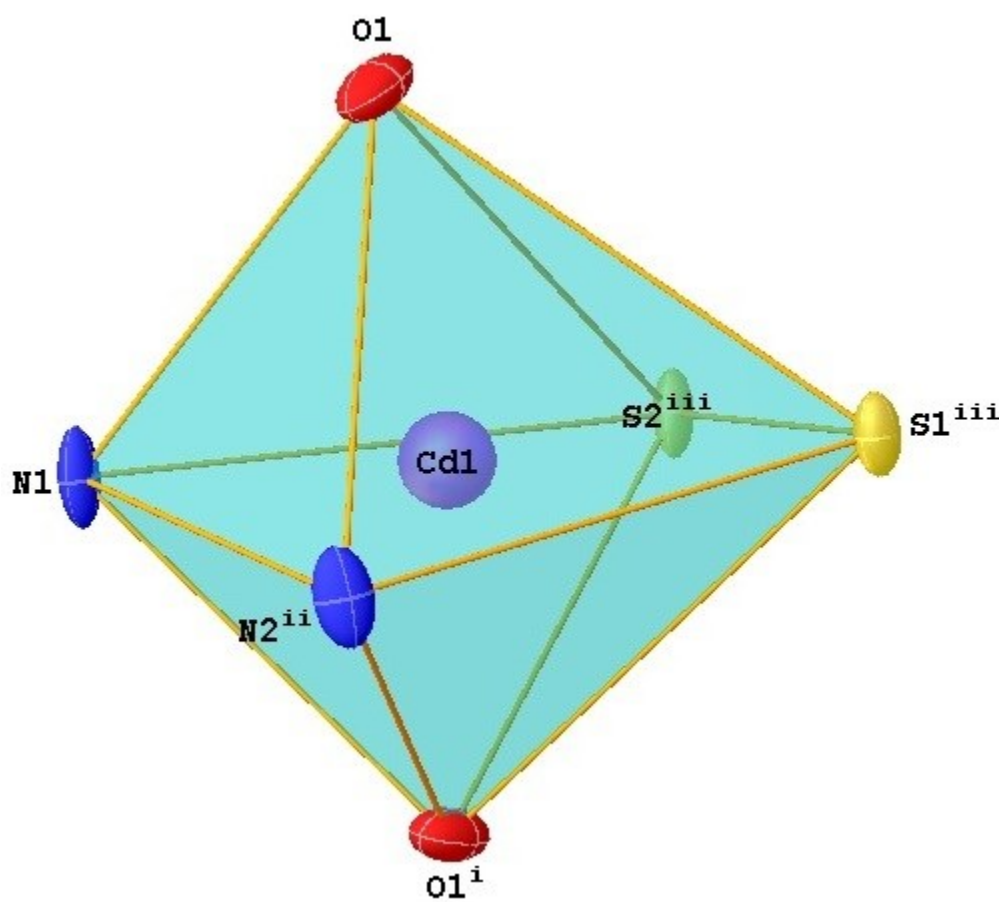

**Figure S6.** Coordination polyhedron of Cd(II) in  $[Cd(i-mnt)(DMSO)_2]_n$  (**1**)

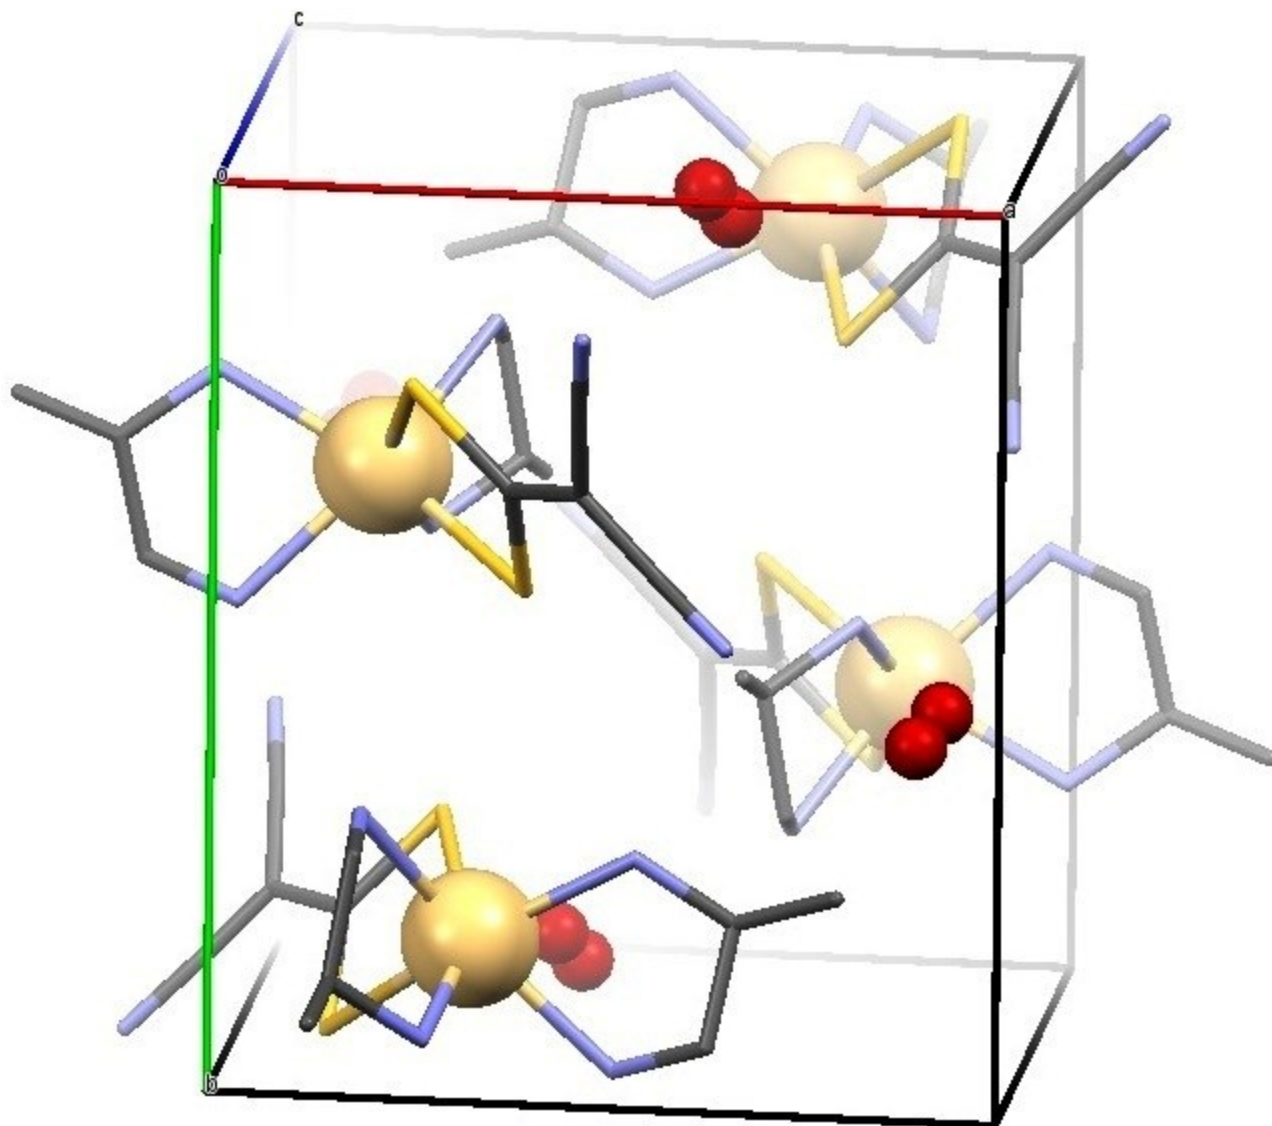

**Figure S7.** Polyhedral view of the unit cell packing for  $\{[Cd(i-mnt)pn] \cdot 2H_2O\}$  (**2**) comprising of four discrete molecules.

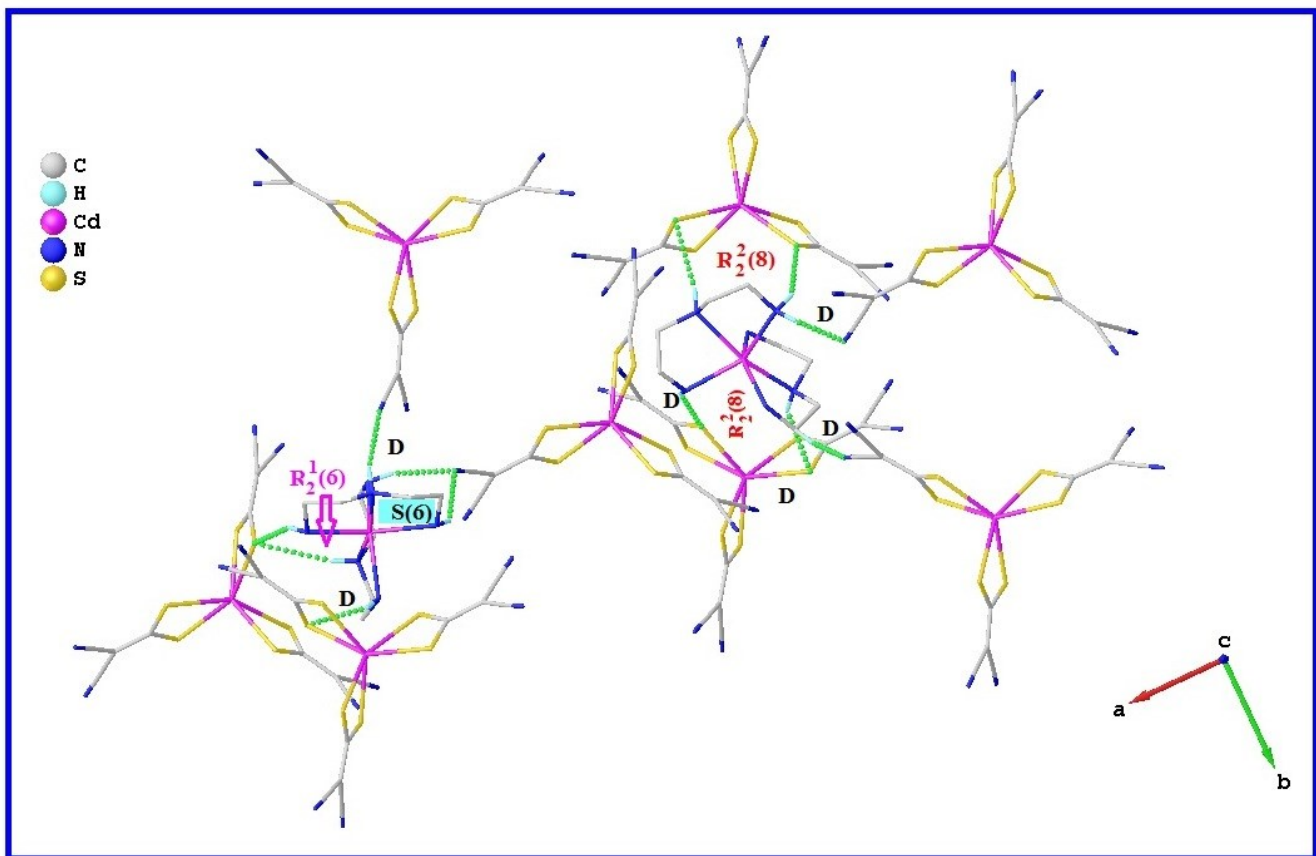

**Figure S8.** Graph-set motifs in  $[Cd(i-mnt)_3][Cd(tren)_2]_2$  (**3**) comprising of four discrete molecules.

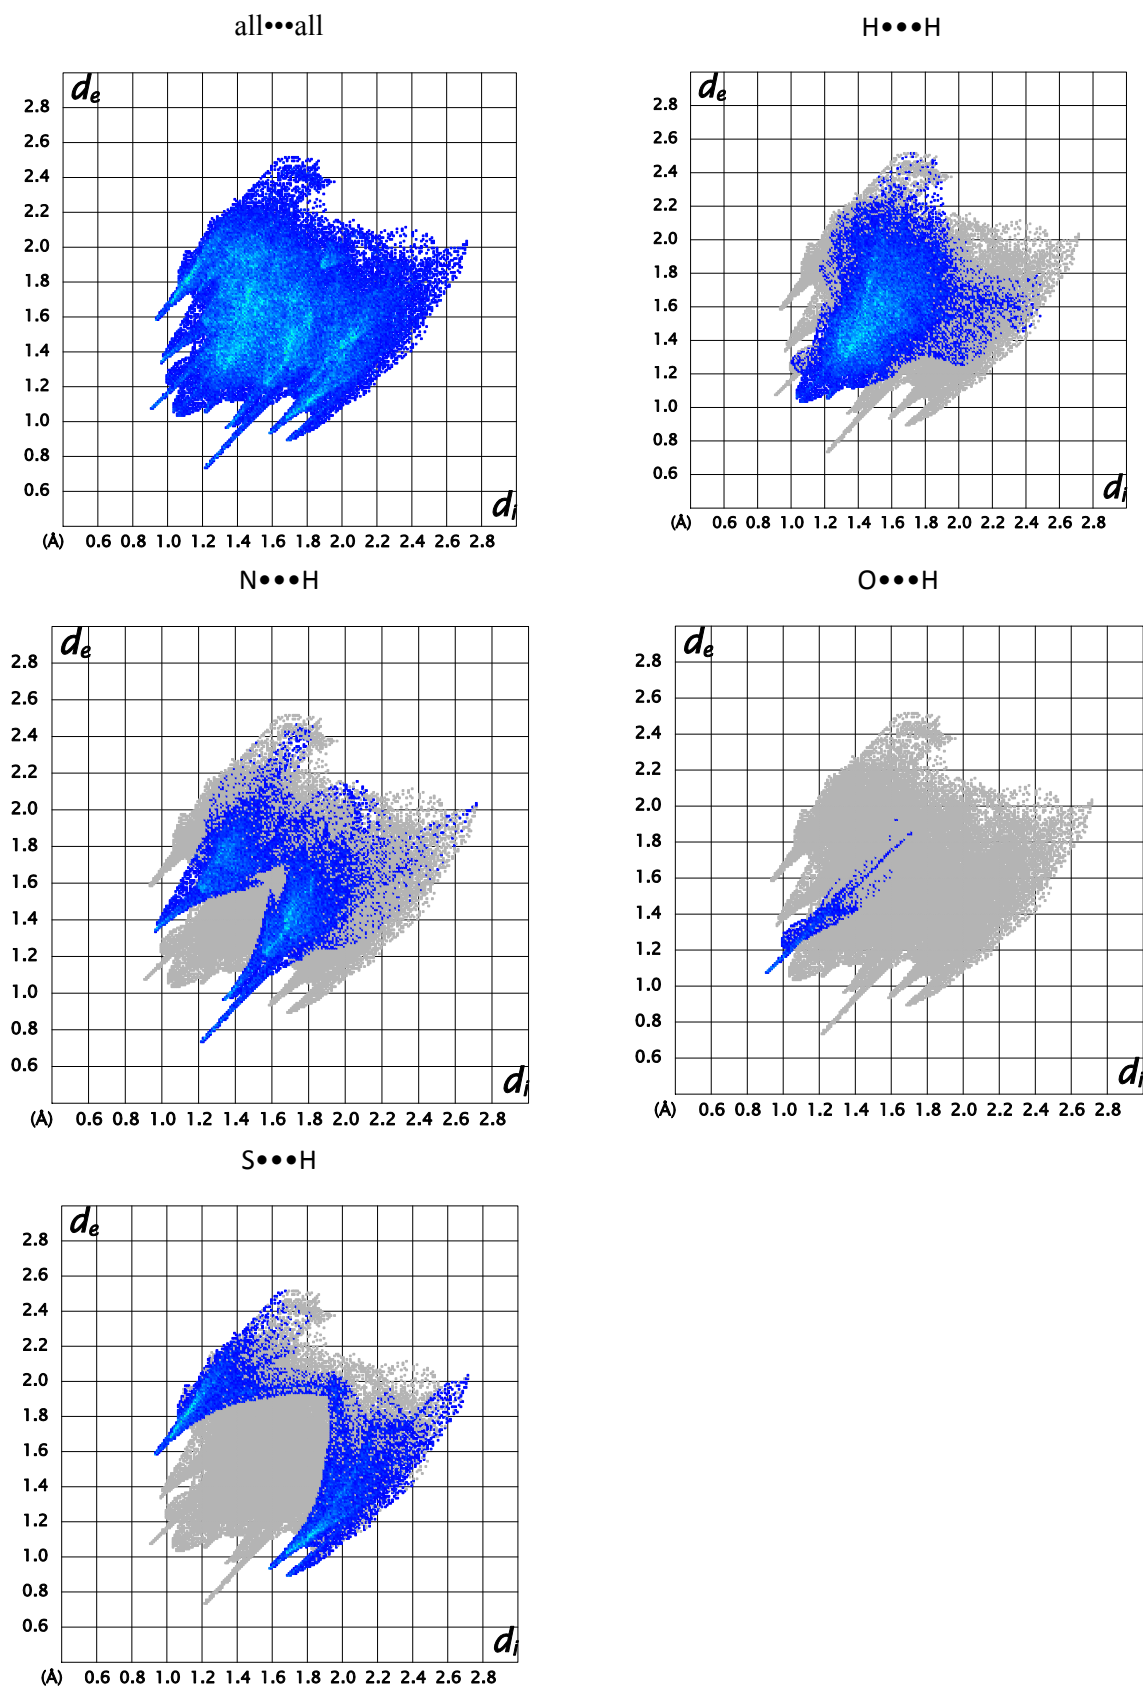

Figure S9. Decomposed fingerprint plots of complex molecule in 2

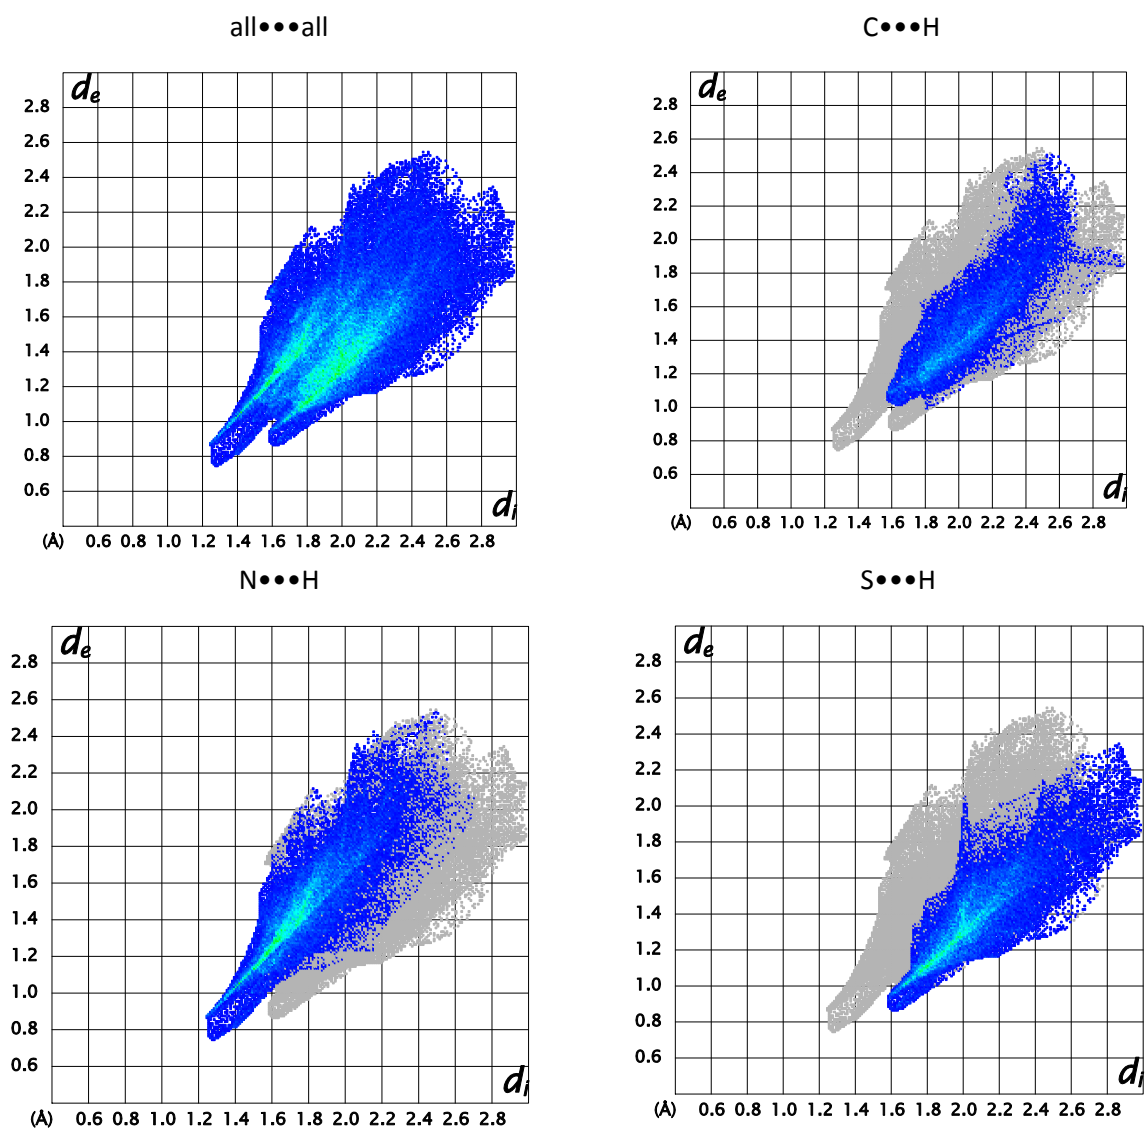

Figure S10. Decomposed fingerprint plots of 3A

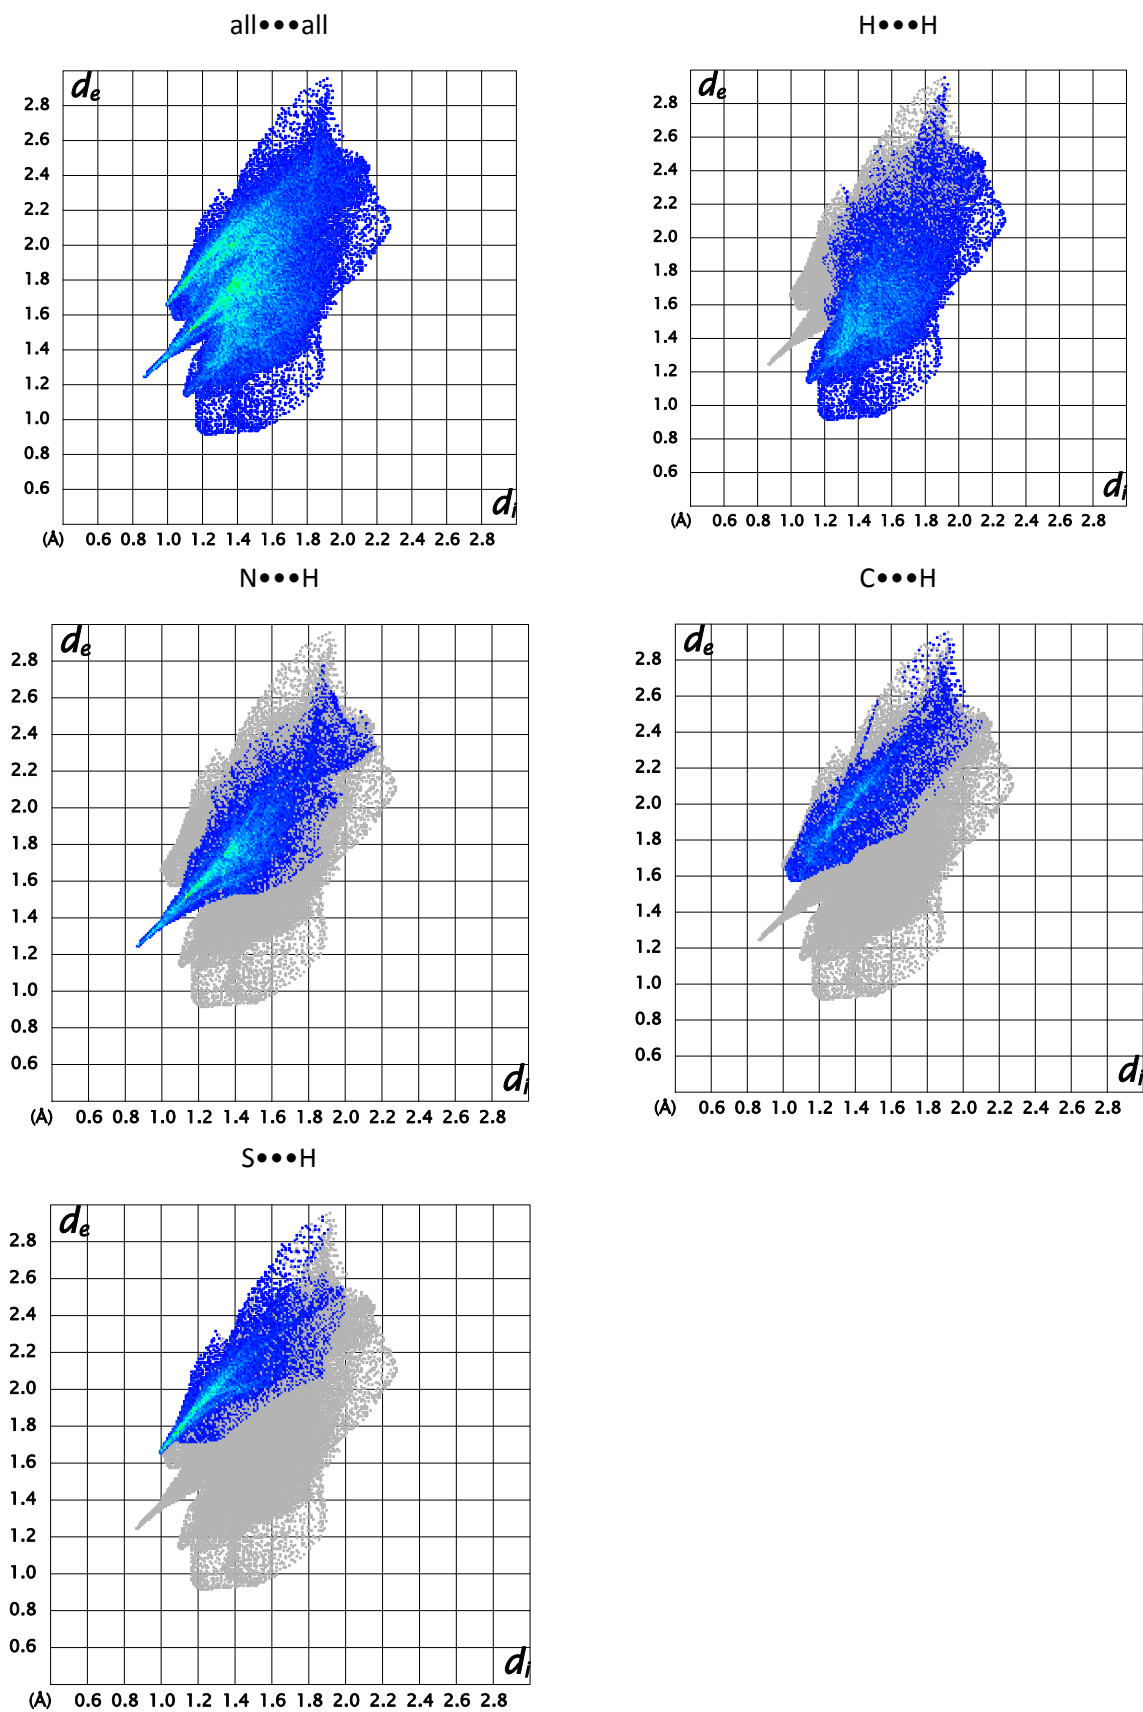

Figure S11. Decomposed fingerprint plots of 3B

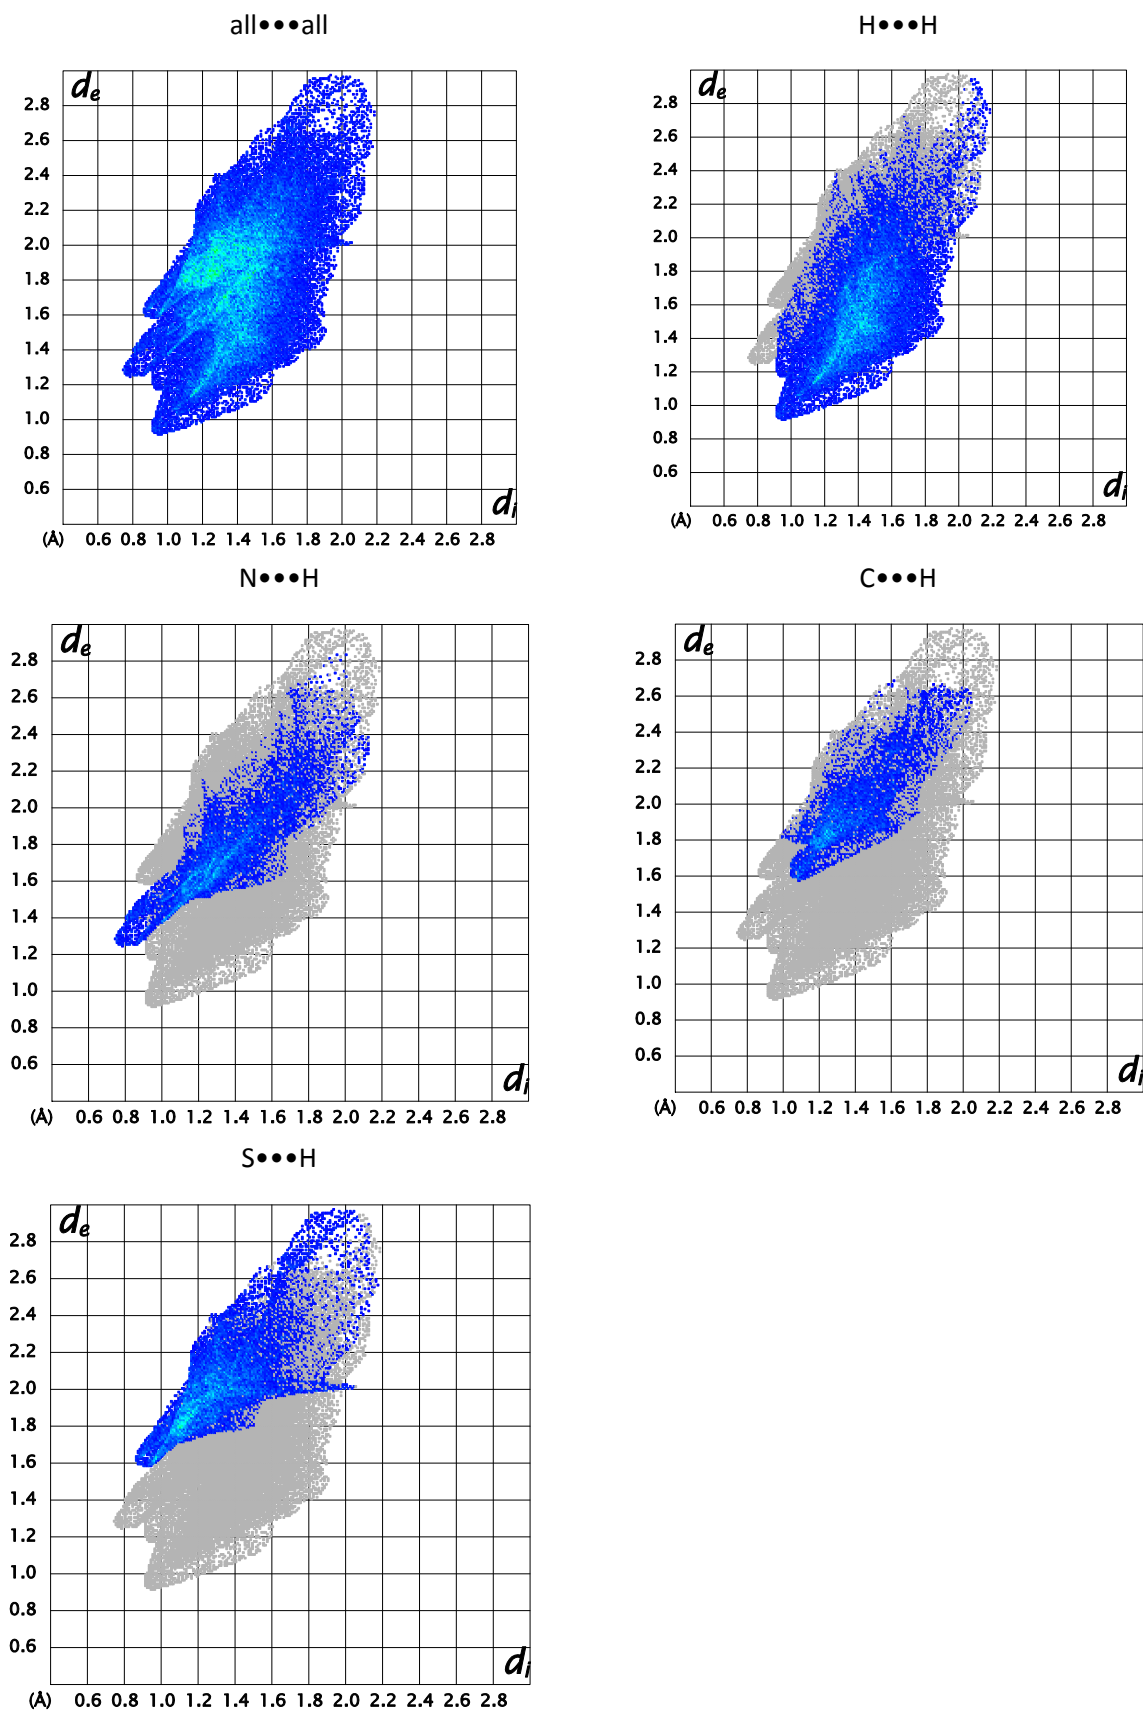

Figure S12. Decomposed fingerprint plots of 3C



**Table S1. Crystal data and structure refinement for 1-3.**

|                                           | <b>1</b>                                                                      | <b>2</b>                                                         | <b>3</b>                                                                       |
|-------------------------------------------|-------------------------------------------------------------------------------|------------------------------------------------------------------|--------------------------------------------------------------------------------|
| <b>Empirical formula</b>                  | C <sub>8</sub> H <sub>12</sub> CdN <sub>2</sub> O <sub>2</sub> S <sub>4</sub> | C <sub>10</sub> H <sub>22</sub> CdN <sub>6</sub> OS <sub>2</sub> | C <sub>28</sub> H <sub>52</sub> Cd <sub>3</sub> N <sub>18</sub> S <sub>6</sub> |
| <b>Formula weight</b>                     | 408.84                                                                        | 418.85                                                           | 1170.43                                                                        |
| <b>Temperature (K)</b>                    | 100(2)                                                                        | 152(2)                                                           | 100(2)                                                                         |
| <b>Crystal system</b>                     | Orthorhombic                                                                  | monoclinic                                                       | orthorhombic                                                                   |
| <b>Space group</b>                        | Pnma                                                                          | P2 <sub>1</sub> /n                                               | P2 <sub>1</sub> 2 <sub>1</sub> 2 <sub>1</sub>                                  |
| <b>a (Å)</b>                              | 13.1254(6)                                                                    | 9.7864(5)                                                        | 14.6814(3)                                                                     |
| <b>b (Å)</b>                              | 13.6595(6)                                                                    | 10.9611(6)                                                       | 17.4409(4)                                                                     |
| <b>c (Å)</b>                              | 8.5225(4)                                                                     | 16.0220(8)                                                       | 17.6486(4)                                                                     |
| <b>α (°)</b>                              | 90                                                                            | 90                                                               | 90                                                                             |
| <b>β (°)</b>                              | 90                                                                            | 102.095(2)                                                       | 90                                                                             |
| <b>γ (°)</b>                              | 90                                                                            | 90                                                               | 90                                                                             |
| <b>V (Å<sup>3</sup>)</b>                  | 1527.97(12)                                                                   | 1680.52(15)                                                      | 4519.04(17)                                                                    |
| <b>Z</b>                                  | 4                                                                             | 4                                                                | 4                                                                              |
| <b>D<sub>cal</sub> (gcm<sup>-3</sup>)</b> | 1.777                                                                         | 1.655                                                            | 1.720                                                                          |
| <b>μ (mm<sup>-1</sup>)</b>                | 16.508                                                                        | 12.781                                                           | 14.161                                                                         |
| <b>F(000)</b>                             | 808                                                                           | 848                                                              | 2344                                                                           |
| <b>Crystal size (mm<sup>3</sup>)</b>      | 0.14 × 0.12 × 0.05                                                            | 0.18 × 0.06 × 0.02                                               | 0.126 × 0.108 × 0.099                                                          |
| <b>θ range for data collection (°)</b>    | 6.12 to 66.85                                                                 | 4.88 to 66.76                                                    | 3.56 to 72.44                                                                  |
| <b>Index ranges</b>                       | -15 ≤ h ≤ 14,<br>-16 ≤ k ≤ 16,<br>-10 ≤ l ≤ 10                                | -11 ≤ h ≤ 11,<br>-13 ≤ k ≤ 12,<br>-19 ≤ l ≤ 19                   | -18 ≤ h ≤ 18,<br>-21 ≤ k ≤ 21,<br>-21 ≤ l ≤ 21                                 |
| <b>Reflections collected</b>              | 24854                                                                         | 27384                                                            | 40692                                                                          |

|                                                                         |                                    |                                    |                                    |
|-------------------------------------------------------------------------|------------------------------------|------------------------------------|------------------------------------|
| <b>Independent reflections</b>                                          | 1411 [ $R_{\text{int}} = 0.0575$ ] | 2973 [ $R_{\text{int}} = 0.0439$ ] | 8919 [ $R_{\text{int}} = 0.0746$ ] |
| <b>Absorption correction</b>                                            | Multi scan                         | Multi scan                         | Multi scan                         |
| <b>Max and min transmission</b>                                         | 0.49 and 0.42                      | 0.78 and 0.52                      | 0.34 and 0.27                      |
| <b>Data/restraints/parameters</b>                                       | 1411/144/163                       | 2973/22/239                        | 8919/169/629                       |
| <b>Goodness-of-fit on <math>F^2</math></b>                              | 1.256                              | 1.035                              | 1.064                              |
| <b>Final R indexes [<math>I \geq 2\sigma(I)</math>]</b>                 | $R_1 = 0.0325,$<br>$wR_2 = 0.0756$ | $R_1 = 0.0196,$<br>$wR_2 = 0.0452$ | $R_1 = 0.0313,$<br>$wR_2 = 0.0711$ |
| <b>Final R indexes [all data]</b>                                       | $R_1 = 0.0330,$<br>$wR_2 = 0.0758$ | $R_1 = 0.0209,$<br>$wR_2 = 0.0458$ | $R_1 = 0.0347,$<br>$wR_2 = 0.0729$ |
| <b>Largest diff. in peak and hole (<math>e \text{ \AA}^{-3}</math>)</b> | 0.694 and -0.740                   | 0.416 and -0.322                   | 1.048 and -1.675                   |

---

**Table S2.** Bond lengths (Å) for **1-3**

| <b>Complex 1</b>            |             |                                       |             |                                       |             |
|-----------------------------|-------------|---------------------------------------|-------------|---------------------------------------|-------------|
| <b>N1—C3</b>                | 1.141 (9)   | <b>S3—C5</b>                          | 1.781 (9)   | <b>C5<sup>i</sup>—H5B<sup>i</sup></b> | 0.98        |
| <b>N1—Cd1</b>               | 2.319 (5)   | <b>C5—H5A</b>                         | 0.98        | <b>C5<sup>i</sup>—H5C<sup>i</sup></b> | 0.98        |
| <b>C3—C2</b>                | 1.391 (9)   | <b>C5—H5B</b>                         | 0.98        | <b>C6<sup>i</sup>—H6A<sup>i</sup></b> | 0.98        |
| <b>Cd1—N2<sup>ii</sup></b>  | 2.348(10)   | <b>C5—H5C</b>                         | 0.98        | <b>C6<sup>i</sup>—H6B<sup>i</sup></b> | 0.98        |
| <b>S1—C1</b>                | 1.707 (8)   | <b>C6—H6A</b>                         | 0.98        | <b>C6<sup>i</sup>—H6C<sup>i</sup></b> | 0.98        |
| <b>Cd1—O1</b>               | 2.327 (5)   | <b>C6—H6B</b>                         | 0.98        | <b>C1—C2</b>                          | 1.425 (6)   |
| <b>Cd1—O1<sup>i</sup></b>   | 2.327 (5)   | <b>C6—H6C</b>                         | 0.98        | <b>C1—S2</b>                          | 1.730 (6)   |
| <b>Cd1—S1<sup>iii</sup></b> | 2.665(12)   | <b>O1<sup>i</sup>—S3<sup>i</sup></b>  | 1.510 (5)   | <b>C2—C4</b>                          | 1.429 (6)   |
| <b>Cd1—S2<sup>iii</sup></b> | 2.603(19)   | <b>S3<sup>i</sup>—C6<sup>i</sup></b>  | 1.771 (10)  | <b>C4—N2</b>                          | 1.148 (5)   |
| <b>O1—S3</b>                | 1.510 (5)   | <b>S3<sup>i</sup>—C5<sup>i</sup></b>  | 1.781 (9)   |                                       |             |
| <b>S3—C6</b>                | 1.771 (10)  | <b>C5<sup>i</sup>—H5A<sup>i</sup></b> | 0.98        |                                       |             |
| <b>Complex 2</b>            |             |                                       |             |                                       |             |
| <b>Cd1—N6</b>               | 2.3685 (19) | <b>C2—C4</b>                          | 1.416 (3)   | <b>Cd1—N3</b>                         | 2.3695 (19) |
| <b>C2—C3</b>                | 1.423 (3)   | <b>Cd1—N5</b>                         | 2.3709 (19) | <b>C5—C6</b>                          | 1.524 (3)   |
| <b>Cd1—N4</b>               | 2.3922 (18) | <b>C5—H5A</b>                         | 0.99        | <b>Cd1—S1</b>                         | 2.6633 (5)  |
| <b>C5—H5B</b>               | 0.99        | <b>Cd1—S2</b>                         | 2.7099 (5)  | <b>C6—C7</b>                          | 1.514 (3)   |
| <b>S1—C1</b>                | 1.729 (2)   | <b>C6—H6</b>                          | 1.0         | <b>S2—C1</b>                          | 1.726 (2)   |
| <b>C7—H7A</b>               | 0.98        | <b>N1—C3</b>                          | 1.148 (3)   | <b>C7—H7B</b>                         | 0.98        |
| <b>N2—C4</b>                | 1.156 (3)   | <b>C7—H7C</b>                         | 0.98        | <b>N3—C5</b>                          | 1.469 (3)   |
| <b>C8—C9</b>                | 1.519 (3)   | <b>N3—H3A</b>                         | 0.89 (3)    | <b>C8—H8A</b>                         | 0.99        |
| <b>N3—H3B</b>               | 0.87 (3)    | <b>C8—H8B</b>                         | 0.99        | <b>N4—C6</b>                          | 1.479 (3)   |
| <b>C9—C10</b>               | 1.519 (3)   | <b>N4—H4A</b>                         | 0.85 (3)    | <b>C9—H9</b>                          | 1.0         |
| <b>N4—H4B</b>               | 0.85 (3)    | <b>C10—H10A</b>                       | 0.98        | <b>N5—C8</b>                          | 1.476 (3)   |
| <b>C10—H10B</b>             | 0.98        | <b>N5—H5C</b>                         | 0.96 (3)    | <b>C10—H10C</b>                       | 0.98        |
| <b>N5—H5D</b>               | 0.88 (3)    | <b>O1—H1A</b>                         | 0.880 (19)  | <b>N6—C9</b>                          | 1.476 (3)   |
| <b>O1—H1B</b>               | 0.88 (2)    | <b>N6—H6A</b>                         | 0.81 (3)    | <b>O1A—H1C</b>                        | 0.89 (2)    |
| <b>N6—H6B</b>               | 0.77 (4)    | <b>O1A—H1D</b>                        | 0.87 (2)    | <b>C1—C2</b>                          | 1.402 (3)   |

| <b>Complex 3</b> |             |          |            |          |            |
|------------------|-------------|----------|------------|----------|------------|
| <b>C1—C2</b>     | 1.407 (8)   | C33—N34  | 1.470 (8)  | N61—H61A | 0.88 (2)   |
| <b>C1—S2</b>     | 1.718 (6)   | C33—H33A | 0.99       | N61—H61B | 0.88 (2)   |
| <b>C1—S1</b>     | 1.722 (7)   | C33—H33B | 0.99       | C62—C63  | 1.503 (14) |
| <b>Cd1—S6</b>    | 2.5540 (17) | N34—C35  | 1.479 (9)  | C62—H62A | 0.99       |
| <b>Cd1—S4</b>    | 2.5597 (16) | N34—H34  | 0.88 (3)   | C62—H62B | 0.99       |
| <b>Cd1—S1</b>    | 2.6389 (15) | C35—C36  | 1.515 (10) | C63—N64  | 1.507 (12) |
| <b>Cd1—S2</b>    | 2.7212 (18) | C35—H35A | 0.99       | C63—H63A | 0.99       |
| <b>Cd1—S5</b>    | 2.9525 (17) | C35—H35B | 0.99       | C63—H63B | 0.99       |
| <b>Cd1—S3</b>    | 2.972 (2)   | C36—N37  | 1.472 (8)  | N64—C65  | 1.473 (13) |
| <b>N1—C3</b>     | 1.146 (10)  | N47—H47A | 0.87 (3)   | N64—H64  | 0.89 (3)   |
| <b>C2—C4</b>     | 1.415 (10)  | N47—H47B | 0.90 (3)   | C65—C66  | 1.504 (15) |
| <b>C2—C3</b>     | 1.425 (10)  | N51—C52  | 1.497 (11) | C65—H65A | 0.99       |
| <b>Cd2—N34</b>   | 2.365 (5)   | N51—Cd3  | 2.457 (6)  | C65—H65B | 0.99       |
| <b>Cd2—N41</b>   | 2.365 (5)   | N51—H51A | 0.90 (3)   | C66—N67  | 1.481 (16) |
| <b>Cd2—N31</b>   | 2.367 (6)   | N51—H51B | 0.90 (3)   | C66—H66A | 0.99       |
| <b>Cd2—N47</b>   | 2.380 (5)   | C52—C53  | 1.490 (12) | C66—H66B | 0.99       |
| <b>Cd2—N37</b>   | 2.387 (6)   | C52—H52A | 0.99       | N67—H67A | 0.89 (3)   |
| <b>Cd2—N44</b>   | 2.393 (6)   | C52—H52B | 0.99       | N67—H67B | 0.89 (3)   |
| <b>N2—C4</b>     | 1.152 (11)  | C53—N54  | 1.477 (10) | C36—H36A | 0.99       |
| <b>N3—C13</b>    | 1.139 (11)  | C53—H53A | 0.99       | C36—H36B | 0.99       |
| <b>S3—C11</b>    | 1.710 (7)   | C53—H53B | 0.99       | N37—H37A | 0.89 (3)   |
| <b>N4—C14</b>    | 1.169 (10)  | N54—C55  | 1.466 (10) | N37—H37B | 0.87 (3)   |
| <b>S4—C11</b>    | 1.731 (7)   | N54—Cd3  | 2.326 (6)  | N41—C42  | 1.479 (9)  |
| <b>N5—C23</b>    | 1.134 (9)   | N54—H54  | 0.88 (3)   | N41—H41A | 0.89 (3)   |
| <b>S5—C21</b>    | 1.719 (7)   | C55—C56  | 1.493 (13) | N41—H41B | 0.88 (3)   |
| <b>N6—C24</b>    | 1.161 (9)   | C55—H55A | 0.99       | C42—C43  | 1.528 (9)  |
| <b>S6—C21</b>    | 1.726 (7)   | C55—H55B | 0.99       | C42—H42A | 0.99       |

|                 |            |          |            |          |            |
|-----------------|------------|----------|------------|----------|------------|
| <b>C11—C12</b>  | 1.393 (10) | C56—N57  | 1.473 (13) | C42—H42B | 0.99       |
| <b>C12—C14</b>  | 1.412 (11) | C56—H56A | 0.99       | C43—N44  | 1.467 (8)  |
| <b>C12—C13</b>  | 1.434 (10) | C56—H56B | 0.99       | C43—H43A | 0.99       |
| <b>C21—C22</b>  | 1.412 (8)  | N57—Cd3  | 2.375 (8)  | C43—H43B | 0.99       |
| <b>C22—C24</b>  | 1.414 (9)  | N57—H57A | 0.89 (3)   | N44—C45  | 1.472 (8)  |
| <b>C22—C23</b>  | 1.430 (9)  | N57—H57B | 0.89 (3)   | N44—H44  | 0.89 (3)   |
| <b>N31—C32</b>  | 1.489 (9)  | Cd3—N61A | 2.306 (5)  | C45—C46  | 1.513 (10) |
| <b>N31—H31A</b> | 0.88 (3)   | Cd3—N61  | 2.306 (5)  | C45—H45A | 0.99       |
| <b>N31—H31B</b> | 0.87 (3)   | Cd3—N67A | 2.368 (16) | C45—H45B | 0.99       |
| <b>C32—C33</b>  | 1.498 (10) | Cd3—N64  | 2.386 (7)  | C46—N47  | 1.471 (9)  |
| <b>C32—H32A</b> | 0.99       | Cd3—N67  | 2.388 (10) | C46—H46A | 0.99       |
| <b>C32—H32B</b> | 0.99       | N61—C62  | 1.466 (11) | C46—H46B | 0.99       |

**Symmetry codes:** (i)  $x, 3/2-y, z$ ; (ii)  $1/2+x, y, 3/2-z$ ; (iii)  $x, 3/2-y, 1+z$

**Table S3.** Bond angles ( $^{\circ}$ ) for **1-3**

| <b>Complex 1</b>                                    |             |                                                           |             |                                                           |             |
|-----------------------------------------------------|-------------|-----------------------------------------------------------|-------------|-----------------------------------------------------------|-------------|
| <b>S1<sup>iii</sup>—Cd1—S2<sup>iii</sup></b>        | 68.9(2)     | <b>S3<sup>i</sup>—C6<sup>i</sup>—H6B<sup>i</sup></b>      | 109.5(12)   | <b>S2<sup>iii</sup>—Cd1—N1</b>                            | 106.6(3)    |
| <b>N1—Cd1—N2<sup>ii</sup></b>                       | 88.2(2)     | <b>N2<sup>ii</sup>—Cd1—O1<sup>i</sup></b>                 | 98.9(4)     | <b>O1<sup>i</sup>—Cd1—O1</b>                              | 168.6(7)    |
| <b>S1<sup>iii</sup>—Cd1—N2<sup>ii</sup></b>         | 96.3(17)    | <b>S1<sup>iii</sup>—Cd1—O1</b>                            | 95.6(3)     | <b>Cd1—O1—S3</b>                                          | 118.9(2)    |
| <b>S1<sup>iii</sup>—Cd1—O1<sup>i</sup></b>          | 95.6(3)     | <b>S2<sup>iii</sup>—Cd1—O1</b>                            | 96.9(5)     | <b>O1—S3—C5</b>                                           | 103.3(3)    |
| <b>S2<sup>iii</sup>—Cd1—O1<sup>i</sup></b>          | 84.9(5)     | <b>N1—Cd1—O1</b>                                          | 84.3(3)     | <b>O1—S3—C6</b>                                           | 106.0(5)    |
| <b>N1—Cd1—O1<sup>i</sup></b>                        | 84.3(3)     | <b>N2<sup>ii</sup>—Cd1—O1</b>                             | 82.2(7)     | <b>S3—C5—H5A</b>                                          | 109.4(3)    |
| <b>S3—C5—H5B</b>                                    | 109.4(12)   | <b>S3<sup>i</sup>—C6<sup>i</sup>—H6C<sup>i</sup></b>      | 109.5(15)   | <b>C1<sup>iii</sup>—C2<sup>iii</sup>—C4<sup>iii</sup></b> | 118.1(12)   |
| <b>S3—C5—H5C</b>                                    | 109.5(15)   | <b>Cd1—S1<sup>iii</sup>—C1<sup>iii</sup></b>              | 84.0(10)    | <b>C3<sup>iii</sup>—C2<sup>iii</sup>—C4<sup>iii</sup></b> | 115.9(18)   |
| <b>S3—C6—H6A</b>                                    | 109.5(7)    | <b>Cd1—S2<sup>iii</sup>—C1<sup>iii</sup></b>              | 85.6(3)     | <b>C2<sup>iii</sup>—C3<sup>iii</sup>—N1<sup>iii</sup></b> | 175.9(15)   |
| <b>S3—C6—H6B</b>                                    | 109.5(9)    | <b>S1<sup>iii</sup>—C1<sup>iii</sup>—S2<sup>iii</sup></b> | 120.3(2)    | <b>C2<sup>iii</sup>—C4<sup>iii</sup>—N2<sup>iii</sup></b> | 172.7(4)    |
| <b>S3—C6—H6C</b>                                    | 109.4(2)    | <b>S1<sup>iii</sup>—C1<sup>iii</sup>—C2<sup>iii</sup></b> | 120.1(11)   | <b>Cd1—N1—C3</b>                                          | 169.6(5)    |
| <b>Cd1—O1<sup>i</sup>—S3<sup>i</sup></b>            | 118.9(2)    | <b>S2<sup>iii</sup>—C1<sup>iii</sup>—C2<sup>iii</sup></b> | 118.8(3)    | <b>N1—C3—C2</b>                                           | 175.9(15)   |
| <b>O1<sup>i</sup>—S3<sup>i</sup>—C5<sup>i</sup></b> | 103.3(3)    | <b>C1<sup>iii</sup>—C2<sup>iii</sup>—C3<sup>iii</sup></b> | 124.9(3)    | <b>N2—C4—C2</b>                                           | 172.7(4)    |
| <b>C3—C2—C4</b>                                     | 115.9(18)   | <b>Cd1—N2<sup>ii</sup>—C4<sup>ii</sup></b>                | 152.4(15)   | <b>S3<sup>i</sup>—C6<sup>i</sup>—H6A<sup>i</sup></b>      | 109.5(7)    |
| <b>C3—C2—C1</b>                                     | 124.9(3)    | <b>S3<sup>i</sup>—C5<sup>i</sup>—H5B<sup>i</sup></b>      | 109.5(12)   | <b>O1<sup>i</sup>—S3<sup>i</sup>—C6<sup>i</sup></b>       | 106.0(5)    |
| <b>C4—C2—C1</b>                                     | 118.1(12)   | <b>S3<sup>i</sup>—C5<sup>i</sup>—H5C<sup>i</sup></b>      | 109.5(15)   | <b>S3<sup>i</sup>—C5<sup>i</sup>—H5A<sup>i</sup></b>      | 109.5(3)    |
| <b>Complex 2</b>                                    |             |                                                           |             |                                                           |             |
| <b>N6—Cd1—N3</b>                                    | 90.30 (7)   | <b>C1—C2—C4</b>                                           | 121.72 (19) | <b>N6—Cd1—N5</b>                                          | 74.50 (7)   |
| <b>C1—C2—C3</b>                                     | 122.2 (2)   | <b>N2—C4—C2</b>                                           | 177.1 (2)   | <b>C6—C5—H5A</b>                                          | 109.6       |
| <b>N3—Cd1—N5</b>                                    | 156.46 (7)  | <b>N5—Cd1—N4</b>                                          | 89.09 (7)   | <b>N5—Cd1—S1</b>                                          | 94.68 (5)   |
| <b>C4—C2—C3</b>                                     | 116.00 (19) | <b>N3—C5—C6</b>                                           | 110.34 (19) | <b>N3—C5—H5B</b>                                          | 109.6       |
| <b>N6—Cd1—N4</b>                                    | 95.37 (8)   | <b>N6—Cd1—S1</b>                                          | 160.93 (6)  | <b>N4—Cd1—S1</b>                                          | 100.19 (5)  |
| <b>N1—C3—C2</b>                                     | 177.4 (2)   | <b>N3—C5—H5A</b>                                          | 109.6       | <b>C6—C5—H5B</b>                                          | 109.6       |
| <b>N3—Cd1—N4</b>                                    | 74.28 (7)   | <b>N3—Cd1—S1</b>                                          | 104.44 (5)  | <b>N6—Cd1—S2</b>                                          | 100.56 (6)  |
| <b>H5A—C5—H5B</b>                                   | 108.1       | <b>N3—Cd1—S2</b>                                          | 91.58 (5)   | <b>N4—C6—C7</b>                                           | 113.50 (18) |
| <b>N5—Cd1—S2</b>                                    | 108.59 (5)  | <b>C7—C6—H6</b>                                           | 107.9       | <b>Cd1—N3—H3A</b>                                         | 113.2 (19)  |

|                           |             |               |             |               |             |
|---------------------------|-------------|---------------|-------------|---------------|-------------|
| <b>N4—C6—C5</b>           | 108.48 (18) | C1—S2—Cd1     | 85.35 (7)   | H7A—C7—H7B    | 109.5       |
| <b>N4—Cd1—S2</b>          | 158.76 (5)  | C5—C6—H6      | 107.9       | C5—N3—H3B     | 113.0 (19)  |
| <b>C7—C6—C5</b>           | 111.1 (2)   | C5—N3—Cd1     | 109.22 (13) | C6—C7—H7C     | 109.5       |
| <b>S1—Cd1—S2</b>          | 67.532 (16) | C6—C7—H7A     | 109.5       | Cd1—N3—H3B    | 103.8 (18)  |
| <b>N4—C6—H6</b>           | 107.9       | C5—N3—H3A     | 110.7 (19)  | H7A—C7—H7C    | 109.5       |
| <b>C1—S1—Cd1</b>          | 86.78 (7)   | C6—C7—H7B     | 109.5       | H3A—N3—H3B    | 107 (3)     |
| <b>H7B—C7—H7C</b>         | 109.5       | N5—C8—H8A     | 109.6       | N5—C8—H8B     | 109.6       |
| <b>C6—N4—Cd1</b>          | 109.36 (13) | Cd1—N4—H4A    | 109.2 (18)  | Cd1—N4—H4B    | 111 (2)     |
| <b>N5—C8—C9</b>           | 110.22 (18) | C9—C8—H8A     | 109.6       | C9—C8—H8B     | 109.6       |
| <b>C6—N4—H4A</b>          | 107.1 (18)  | C6—N4—H4B     | 112 (2)     | H4A—N4—H4B    | 109 (3)     |
| <b>H8A—C8—H8B</b>         | 108.1       | N6—C9—C8      | 109.29 (18) | N6—C9—C10     | 112.8 (2)   |
| <b>C8—N5—Cd1</b>          | 107.88 (13) | C8—N5—H5C     | 108.7 (18)  | Cd1—N5—H5C    | 114.0 (17)  |
| <b>C8—C9—C10</b>          | 111.31 (19) | H5C—N5—H5D    | 107 (3)     | C9—C10—H10B   | 109.5       |
| <b>C8—N5—H5D</b>          | 112 (2)     | C10—C9—H9     | 107.8       | Cd1—N6—H6A    | 113 (2)     |
| <b>N6—C9—H9</b>           | 107.8       | C9—N6—Cd1     | 110.93 (14) | H10A—C10—H10B | 109.5       |
| <b>Cd1—N5—H5D</b>         | 107 (2)     | C9—C10—H10A   | 109.5       | C9—N6—H6B     | 109 (2)     |
| <b>C8—C9—H9</b>           | 107.8       | C9—N6—H6A     | 110 (2)     | C9—C10—H10C   | 109.5       |
| <b>Cd1—N6—H6B</b>         | 106 (2)     | H10B—C10—H10C | 109.5       | C2—C1—S1      | 120.06 (16) |
| <b>H10A—C10—<br/>H10C</b> | 109.5       | C2—C1—S2      | 120.25 (16) | H1C—O1A—H1D   | 140 (10)    |
| <b>H6A—N6—H6B</b>         | 108 (3)     | H1A—O1—H1B    | 117 (5)     | S2—C1—S1      | 119.68 (12) |
| <b>Complex 3</b>          |             |               |             |               |             |
| <b>C2—C1—S2</b>           | 120.5 (5)   | S6—Cd1—S4     | 137.62 (6)  | S6—Cd1—S1     | 105.58 (6)  |
| <b>C2—C1—S1</b>           | 119.8 (5)   | S4—Cd1—S2     | 112.38 (6)  | S4—Cd1—S1     | 107.01 (5)  |
| <b>S2—C1—S1</b>           | 119.6 (4)   | S1—Cd1—S2     | 67.36 (5)   | S6—Cd1—S2     | 104.75 (6)  |
| <b>S6—Cd1—S5</b>          | 65.30 (5)   | S1—Cd1—S3     | 86.58 (5)   | C4—C2—C3      | 115.9 (6)   |
| <b>S4—Cd1—S5</b>          | 94.71 (5)   | S2—Cd1—S3     | 152.08 (5)  | N34—Cd2—N41   | 96.34 (18)  |
| <b>S1—Cd1—S5</b>          | 152.77 (5)  | S5—Cd1—S3     | 118.16 (5)  | N34—Cd2—N31   | 74.9 (2)    |
| <b>S2—Cd1—S5</b>          | 89.50 (5)   | C1—S1—Cd1     | 87.6 (2)    | N41—Cd2—N31   | 103.0 (2)   |

|                      |             |               |             |               |           |
|----------------------|-------------|---------------|-------------|---------------|-----------|
| <b>S6—Cd1—S3</b>     | 91.39 (6)   | C1—C2—C4      | 123.3 (6)   | N34—Cd2—N47   | 117.2 (2) |
| <b>S4—Cd1—S3</b>     | 64.52 (5)   | C1—C2—C3      | 120.6 (6)   | N41—Cd2—N47   | 145.6 (2) |
| <b>N31—Cd2—N47</b>   | 93.5 (2)    | N47—Cd2—N44   | 74.2 (2)    | C21—S6—Cd1    | 93.4 (2)  |
| <b>N34—Cd2—N37</b>   | 74.97 (19)  | N37—Cd2—N44   | 113.40 (19) | C12—C11—S3    | 121.7 (6) |
| <b>N41—Cd2—N37</b>   | 95.1 (2)    | C1—S2—Cd1     | 85.1 (2)    | C12—C11—S4    | 118.7 (5) |
| <b>N31—Cd2—N37</b>   | 146.3 (2)   | N1—C3—C2      | 177.5 (8)   | S3—C11—S4     | 119.6 (4) |
| <b>N47—Cd2—N37</b>   | 87.03 (19)  | C11—S3—Cd1    | 81.4 (2)    | C11—C12—C14   | 123.4 (7) |
| <b>N34—Cd2—N44</b>   | 166.99 (18) | N2—C4—C2      | 176.6 (9)   | C11—C12—C13   | 121.3 (7) |
| <b>N41—Cd2—N44</b>   | 73.52 (18)  | C11—S4—Cd1    | 94.5 (2)    | C14—C12—C13   | 115.1 (7) |
| <b>N31—Cd2—N44</b>   | 99.0 (2)    | C21—S5—Cd1    | 80.7 (2)    | N3—C13—C12    | 178.2 (9) |
| <b>N4—C14—C12</b>    | 179.2 (8)   | N6—C24—C22    | 177.4 (7)   | N31—C32—H32A  | 109.6     |
| <b>C22—C21—S5</b>    | 121.3 (5)   | C32—N31—Cd2   | 108.9 (4)   | C33—C32—H32A  | 109.6     |
| <b>C22—C21—S6</b>    | 118.3 (5)   | C32—N31—H31A  | 106 (5)     | N31—C32—H32B  | 109.6     |
| <b>S5—C21—S6</b>     | 120.4 (4)   | Cd2—N31—H31A  | 115 (5)     | C33—C32—H32B  | 109.6     |
| <b>C21—C22—C24</b>   | 120.8 (6)   | C32—N31—H31B  | 107 (7)     | H32A—C32—H32B | 108.2     |
| <b>C21—C22—C23</b>   | 121.0 (6)   | Cd2—N31—H31B  | 115 (7)     | N34—C33—C32   | 109.4 (6) |
| <b>C24—C22—C23</b>   | 118.2 (5)   | H31A—N31—H31B | 104 (8)     | N34—C33—H33A  | 109.8     |
| <b>N5—C23—C22</b>    | 177.8 (6)   | N31—C32—C33   | 110.1 (5)   | C32—C33—H33A  | 109.8     |
| <b>N34—C33—H33B</b>  | 109.8       | N34—C35—H35B  | 109.7       | C36—N37—H37B  | 113 (6)   |
| <b>C32—C33—H33B</b>  | 109.8       | C36—C35—H35B  | 109.7       | Cd2—N37—H37B  | 111 (6)   |
| <b>H33A—C33—H33B</b> | 108.2       | H35A—C35—H35B | 108.2       | H37A—N37—H37B | 126 (8)   |
| <b>C33—N34—C35</b>   | 115.5 (5)   | N37—C36—C35   | 110.7 (5)   | C42—N41—Cd2   | 112.4 (4) |
| <b>C33—N34—Cd2</b>   | 107.6 (4)   | N37—C36—H36A  | 109.5       | C42—N41—H41A  | 108 (6)   |
| <b>C35—N34—Cd2</b>   | 108.3 (4)   | C35—C36—H36A  | 109.5       | Cd2—N41—H41A  | 114 (6)   |
| <b>C33—N34—H34</b>   | 106 (5)     | N37—C36—H36B  | 109.5       | C42—N41—H41B  | 111 (6)   |
| <b>C35—N34—H34</b>   | 112 (5)     | C35—C36—H36B  | 109.5       | Cd2—N41—H41B  | 100 (6)   |
| <b>Cd2—N34—H34</b>   | 107 (5)     | H36A—C36—H36B | 108.1       | H41A—N41—H41B | 110 (9)   |
| <b>N34—C35—C36</b>   | 109.7 (6)   | C36—N37—Cd2   | 109.0 (4)   | N41—C42—C43   | 111.0 (5) |



|                      |           |               |           |               |           |
|----------------------|-----------|---------------|-----------|---------------|-----------|
| <b>N34—C35—H35A</b>  | 109.7     | C36—N37—H37A  | 95 (6)    | N41—C42—H42A  | 109.4     |
| <b>C36—C35—H35A</b>  | 109.7     | Cd2—N37—H37A  | 100 (6)   | C43—C42—H42A  | 109.4     |
| <b>N41—C42—H42B</b>  | 109.4     | Cd2—N44—H44   | 102 (7)   | C46—N47—H47A  | 114 (6)   |
| <b>C43—C42—H42B</b>  | 109.4     | N44—C45—C46   | 108.5 (6) | Cd2—N47—H47A  | 99 (6)    |
| <b>H42A—C42—H42B</b> | 108.0     | N44—C45—H45A  | 110.0     | C46—N47—H47B  | 109 (5)   |
| <b>N44—C43—C42</b>   | 108.7 (5) | C46—C45—H45A  | 110.0     | Cd2—N47—H47B  | 113 (5)   |
| <b>N44—C43—H43A</b>  | 110.0     | N44—C45—H45B  | 110.0     | H47A—N47—H47B | 112 (8)   |
| <b>C42—C43—H43A</b>  | 110.0     | C46—C45—H45B  | 110.0     | C52—N51—Cd3   | 105.4 (4) |
| <b>N44—C43—H43B</b>  | 110.0     | H45A—C45—H45B | 108.4     | C52—N51—H51A  | 108 (7)   |
| <b>C42—C43—H43B</b>  | 110.0     | N47—C46—C45   | 111.3 (6) | Cd3—N51—H51A  | 107 (6)   |
| <b>H43A—C43—H43B</b> | 108.3     | N47—C46—H46A  | 109.4     | C52—N51—H51B  | 111 (7)   |
| <b>C43—N44—C45</b>   | 113.6 (5) | C45—C46—H46A  | 109.4     | Cd3—N51—H51B  | 114 (7)   |
| <b>C43—N44—Cd2</b>   | 107.5 (4) | N47—C46—H46B  | 109.4     | C53—C52—H52B  | 109.5     |
| <b>C45—N44—Cd2</b>   | 109.4 (4) | C45—C46—H46B  | 109.4     | N51—C52—H52B  | 109.5     |
| <b>C43—N44—H44</b>   | 112 (7)   | H46A—C46—H46B | 108.0     | H52A—C52—H52B | 108.0     |
| <b>C45—N44—H44</b>   | 111 (7)   | C46—N47—Cd2   | 108.8 (4) | N54—C53—C52   | 108.2 (6) |
| <b>N54—C53—H53A</b>  | 110.1     | C55—N54—H54   | 110 (5)   | H55A—C55—H55B | 108.2     |
| <b>C52—C53—H53A</b>  | 110.1     | C53—N54—H54   | 107 (5)   | N57—C56—C55   | 111.0 (7) |
| <b>N54—C53—H53B</b>  | 110.1     | Cd3—N54—H54   | 115 (5)   | N57—C56—H56A  | 109.4     |
| <b>C52—C53—H53B</b>  | 110.1     | N54—C55—C56   | 109.9 (7) | C55—C56—H56A  | 109.4     |
| <b>H53A—C53—H53B</b> | 108.4     | N54—C55—H55A  | 109.7     | N57—C56—H56B  | 109.4     |
| <b>C55—N54—C53</b>   | 115.4 (6) | C56—C55—H55A  | 109.7     | C55—C56—H56B  | 109.4     |
| <b>C55—N54—Cd3</b>   | 102.9 (4) | N54—C55—H55B  | 109.7     | H56A—C56—H56B | 108.0     |
| <b>C53—N54—Cd3</b>   | 107.2 (4) | C56—C55—H55B  | 109.7     | C56—N57—Cd3   | 109.8 (5) |
| <b>C56—N57—H57A</b>  | 104 (7)   | N61—Cd3—N54   | 115.4 (2) | N57—Cd3—N64   | 88.7 (3)  |
| <b>Cd3—N57—H57A</b>  | 125 (7)   | N61—Cd3—N57   | 101.9 (3) | N61—Cd3—N67   | 142.4 (4) |
| <b>C56—N57—H57B</b>  | 104 (10)  | N54—Cd3—N57   | 74.6 (3)  | N54—Cd3—N67   | 100.6 (4) |
| <b>Cd3—N57—H57B</b>  | 124 (10)  | N61—Cd3—N64   | 75.1 (3)  | N57—Cd3—N67   | 97.7 (5)  |

|                      |           |               |           |               |            |
|----------------------|-----------|---------------|-----------|---------------|------------|
| <b>H57A—N57—H57B</b> | 87 (10)   | N54—Cd3—N64   | 161.6 (3) | N64—Cd3—N67   | 73.6 (4)   |
| <b>N61—Cd3—N51</b>   | 90.3 (2)  | Cd3—N61—H61A  | 105 (6)   | N61—C62—H62B  | 110.3      |
| <b>N54—Cd3—N51</b>   | 75.0 (2)  | C62—N61—H61B  | 105 (6)   | C63—C62—H62B  | 110.3      |
| <b>N57—Cd3—N51</b>   | 149.6 (3) | Cd3—N61—H61B  | 111 (6)   | H62A—C62—H62B | 108.5      |
| <b>N64—Cd3—N51</b>   | 121.5 (3) | H61A—N61—H61B | 103 (9)   | C62—C63—N64   | 110.7 (9)  |
| <b>N67—Cd3—N51</b>   | 88.6 (5)  | N61—C62—C63   | 107.3 (9) | C62—C63—H63A  | 109.5      |
| <b>C62—N61—Cd3</b>   | 106.9 (6) | N61—C62—H62A  | 110.3     | N64—C63—H63A  | 109.5      |
| <b>C62—N61—H61A</b>  | 125 (6)   | C63—C62—H62A  | 110.3     | C62—C63—H63B  | 109.5      |
| <b>N64—C63—H63B</b>  | 109.5     | C65—N64—H64   | 99 (8)    | C66—C65—H65A  | 110.2      |
| <b>H63A—C63—H63B</b> | 108.1     | C63—N64—H64   | 107 (8)   | N64—C65—H65B  | 110.2      |
| <b>C65—N64—C63</b>   | 115.0 (9) | Cd3—N64—H64   | 126 (8)   | C66—C65—H65B  | 110.2      |
| <b>C65—N64—Cd3</b>   | 101.8 (6) | N64—C65—C66   | 107.7 (9) | H65A—C65—H65B | 108.5      |
| <b>C63—N64—Cd3</b>   | 107.9 (6) | N64—C65—H65A  | 110.2     | N67—C66—C65   | 113.9 (9)  |
| <b>N67—C66—H66A</b>  | 108.8     | C65—C66—H66B  | 108.8     | C66—N67—H67A  | 103 (10)   |
| <b>C65—C66—H66A</b>  | 108.8     | H66A—C66—H66B | 107.7     | Cd3—N67—H67A  | 121 (10)   |
| <b>N67—C66—H66B</b>  | 108.8     | C66—N67—Cd3   | 109.1 (8) | C66—N67—H67B  | 119 (10)   |
| <b>Cd3—N67—H67B</b>  | 112 (10)  | H67A—N67—H67B | 93 (10)   | C62A—N61A—Cd3 | 107.2 (10) |

**Symmetry codes:** (i)  $x, 3/2-y, z$ ; (ii)  $1/2+x, y, 3/2-z$ ; (iii)  $x, 3/2-y, 1+z$

**Table S4.** Torsion angles ( $^{\circ}$ ) for **1-3**

| <b>Complex 1</b>       |               |                          |              |
|------------------------|---------------|--------------------------|--------------|
| <b>Cd1—O1—S3—C6</b>    | -90.1 (5)     | <b>C3—C2—C4—C4i</b>      | 94.2 (9)     |
| <b>Cd1—O1—S3—C5</b>    | 167.0 (4)     | <b>C1—C2—C4—C4i</b>      | -94.4 (10)   |
| <b>Cd1—O1A—S3A—C6A</b> | 137.7 (12)    | <b>C3—C2—C4—N2i</b>      | 85 (5)       |
| <b>Cd1—O1A—S3A—C5A</b> | -118.0 (11)   | <b>C1—C2—C4—N2i</b>      | -104 (4)     |
| <b>C2—C1—S2—S2i</b>    | 96.8 (6)      | <b>C4i—C2—C4—N2i</b>     | -9 (5)       |
| <b>S1—C1—S2—S2i</b>    | -96.9 (6)     | <b>C4i—C4—N2—N2i</b>     | -0.002 (8)   |
| <b>S1—C1—C2—C3</b>     | 0.0000 (10)   | <b>N2i—C4—N2—C4i</b>     | 0.002 (7)    |
| <b>S2—C1—C2—C3</b>     | 166.2 (12)    | <b>C3—C2—C4A—C4Ai</b>    | 99 (2)       |
| <b>S2i—C1—C2—C3</b>    | -166.2 (12)   | <b>C1—C2—C4A—C4Ai</b>    | -101 (3)     |
| <b>S2A—C1—C2—C3</b>    | 180.0000 (10) | <b>C3—C2—C4A—N2A</b>     | 110 (50)     |
| <b>S1—C1—C2—C4</b>     | -171 (2)      | <b>C1—C2—C4A—N2A</b>     | -90 (50)     |
| <b>S2—C1—C2—C4</b>     | -4 (2)        | <b>C4Ai—C2—C4A—N2A</b>   | 10 (50)      |
| <b>S2i—C1—C2—C4</b>    | 23 (2)        | <b>C3—C2—C4A—N2Ai</b>    | 100 (7)      |
| <b>S1—C1—C2—C4i</b>    | 171 (2)       | <b>C1—C2—C4A—N2Ai</b>    | -100 (6)     |
| <b>S2—C1—C2—C4i</b>    | -23 (2)       | <b>C4Ai—C2—C4A—N2Ai</b>  | 1 (8)        |
| <b>S2i—C1—C2—C4i</b>   | 4 (2)         | <b>C4Ai—C4A—N2A—N2Ai</b> | 0.003 (4)    |
| <b>S1—C1—C2—C4A</b>    | -158 (5)      | <b>C2—C4A—N2A—N2Ai</b>   | -10 (50)     |
| <b>S2A—C1—C2—C4A</b>   | 22 (5)        | <b>C2—C4A—N2A—C4Ai</b>   | -10 (50)     |
| <b>S1—C1—C2—C4Ai</b>   | 158 (5)       | <b>N2Ai—C4A—N2A—C4Ai</b> | -0.003 (4)   |
| <b>S2A—C1—C2—C4Ai</b>  | -22 (5)       |                          |              |
| <b>Complex 2</b>       |               |                          |              |
| <b>Cd1—S2—C1—C2</b>    | 171.31 (17)   | <b>Cd1—N4—C6—C7</b>      | -167.74 (16) |
| <b>Cd1—S2—C1—S1</b>    | -7.80 (11)    | <b>Cd1—N4—C6—C5</b>      | -43.8 (2)    |
| <b>Cd1—S1—C1—C2</b>    | -171.18 (17)  | <b>N3—C5—C6—N4</b>       | 61.1 (2)     |
| <b>Cd1—S1—C1—S2</b>    | 7.92 (11)     | <b>N3—C5—C6—C7</b>       | -173.47 (18) |
| <b>S2—C1—C2—C4</b>     | -4.7 (3)      | <b>Cd1—N5—C8—C9</b>      | -48.2 (2)    |

|                       |             |                        |              |
|-----------------------|-------------|------------------------|--------------|
| <b>S1—C1—C2—C4</b>    | 174.38 (17) | <b>Cd1—N6—C9—C8</b>    | -38.4 (2)    |
| <b>S2—C1—C2—C3</b>    | 177.72 (17) | <b>Cd1—N6—C9—C10</b>   | -162.73 (16) |
| <b>S1—C1—C2—C3</b>    | -3.2 (3)    | <b>N5—C8—C9—N6</b>     | 59.4 (2)     |
| <b>Complex 3</b>      |             |                        |              |
| <b>C2—C1—S1—Cd1</b>   | 173.6 (5)   | <b>Cd2—N41—C42—C43</b> | -30.0 (7)    |
| <b>S2—C1—S1—Cd1</b>   | -5.9 (3)    | <b>N41—C42—C43—N44</b> | 56.4 (7)     |
| <b>S2—C1—C2—C4</b>    | 0.1 (10)    | <b>C42—C43—N44—C45</b> | -173.7 (6)   |
| <b>S1—C1—C2—C4</b>    | -179.4 (5)  | <b>C42—C43—N44—Cd2</b> | -52.5 (6)    |
| <b>S2—C1—C2—C3</b>    | 176.0 (5)   | <b>C43—N44—C45—C46</b> | 164.8 (6)    |
| <b>S1—C1—C2—C3</b>    | -3.5 (9)    | <b>Cd2—N44—C45—C46</b> | 44.6 (6)     |
| <b>C2—C1—S2—Cd1</b>   | -173.7 (5)  | <b>N44—C45—C46—N47</b> | -60.8 (8)    |
| <b>S1—C1—S2—Cd1</b>   | 5.7 (3)     | <b>C45—C46—N47—Cd2</b> | 43.4 (6)     |
| <b>Cd1—S3—C11—C12</b> | -179.4 (6)  | <b>Cd3—N51—C52—C53</b> | 39.0 (8)     |
| <b>Cd1—S3—C11—S4</b>  | -0.7 (3)    | <b>N51—C52—C53—N54</b> | -65.7 (9)    |
| <b>Cd1—S4—C11—C12</b> | 179.5 (5)   | <b>C52—C53—N54—C55</b> | 168.8 (6)    |
| <b>Cd1—S4—C11—S3</b>  | 0.8 (4)     | <b>C52—C53—N54—Cd3</b> | 54.8 (7)     |
| <b>S3—C11—C12—C14</b> | 176.5 (5)   | <b>C53—N54—C55—C56</b> | -176.7 (6)   |
| <b>S4—C11—C12—C14</b> | -2.3 (9)    | <b>Cd3—N54—C55—C56</b> | -60.2 (6)    |
| <b>S3—C11—C12—C13</b> | 3.0 (9)     | <b>N54—C55—C56—N57</b> | 57.9 (8)     |
| <b>S4—C11—C12—C13</b> | -175.8 (5)  | <b>C55—C56—N57—Cd3</b> | -22.7 (8)    |
| <b>Cd1—S5—C21—C22</b> | -174.8 (5)  | <b>Cd3—N61—C62—C63</b> | 57.2 (11)    |
| <b>Cd1—S5—C21—S6</b>  | 4.2 (3)     | <b>N61—C62—C63—N64</b> | -61.5 (14)   |
| <b>Cd1—S6—C21—C22</b> | 174.2 (5)   | <b>C62—C63—N64—C65</b> | -80.4 (12)   |
| <b>Cd1—S6—C21—S5</b>  | -4.8 (4)    | <b>C62—C63—N64—Cd3</b> | 32.5 (12)    |
| <b>S5—C21—C22—C24</b> | 173.9 (5)   | <b>C63—N64—C65—C66</b> | 178.3 (9)    |
| <b>S6—C21—C22—C24</b> | -5.1 (8)    | <b>Cd3—N64—C65—C66</b> | 61.9 (10)    |
| <b>S5—C21—C22—C23</b> | -3.5 (9)    | <b>N64—C65—C66—N67</b> | -55.8 (15)   |
| <b>S6—C21—C22—C23</b> | 177.4 (5)   | <b>C65—C66—N67—Cd3</b> | 17.2 (15)    |

|                        |            |                        |           |
|------------------------|------------|------------------------|-----------|
| <b>Cd2—N31—C32—C33</b> | -40.1 (6)  | <b>C32—C33—N34—Cd2</b> | -49.1 (5) |
| <b>N31—C32—C33—N34</b> | 61.8 (7)   | <b>C33—N34—C35—C36</b> | 167.5 (5) |
| <b>C32—C33—N34—C35</b> | -170.2 (5) | <b>Cd2—N34—C35—C36</b> | 46.8 (6)  |
| <b>N34—C35—C36—N37</b> | -60.4 (7)  | <b>C35—C36—N37—Cd2</b> | 40.3 (6)  |

**Symmetry codes:** (i)  $x, 3/2-y, z$

**Table S5.** Hydrogen bond geometry for **1-3**.

| D H...A                      | d (D H) (Å) | d (H...A) (Å) | d (D...A) (Å) | < (D H...A) (°) |
|------------------------------|-------------|---------------|---------------|-----------------|
| <b>complex 1</b>             |             |               |               |                 |
| C6 H6A...O1 <sup>i</sup>     | 0.98        | 2.35          | 3.273(13)     | 156.8           |
| <b>Complex 2</b>             |             |               |               |                 |
| N3-H3A...O1                  | 0.89        | 2.43          | 3.094(13)     | 130.8           |
| N3-H3A...O1A                 | 0.89        | 2.30          | 2.963(12)     | 130.9           |
| N3-H3B...S1 <sup>i</sup>     | 0.87        | 2.64          | 3.481(12)     | 160.6           |
| N4-H4A...N2 <sup>iii</sup>   | 0.85        | 2.45          | 3.259(13)     | 158.7           |
| N4-H4B...S2 <sup>ii</sup>    | 0.85        | 2.84          | 3.610(16)     | 152.4           |
| N5-H5C...O1A <sup>ii</sup>   | 0.96        | 2.03          | 2.978(14)     | 168.8           |
| O1A-H1D...O1A <sup>vi</sup>  | 0.87        | 2.37          | 3.219(11)     | 164.5           |
| O1-H1B...S2 <sup>iv</sup>    | 0.87        | 2.69          | 3.552(14)     | 169.5           |
| O1-H1A...N1 <sup>v</sup>     | 0.87        | 2.05          | 2.928(12)     | 172.1           |
| <b>Complex 3</b>             |             |               |               |                 |
| N41-H41B...N1                | 0.87        | 2.24          | 3.071(6)      | 159.0           |
| N37-H37B...N1                | 0.87        | 2.42          | 3.118(5)      | 137.4           |
| N34-H34...N5 <sup>i</sup>    | 0.89        | 2.33          | 3.169(5)      | 158.5           |
| N44-H44...S3 <sup>ii</sup>   | 0.89        | 2.79          | 3.660(6)      | 165.7           |
| N31-H31B...S3 <sup>ii</sup>  | 0.87        | 2.77          | 3.544(6)      | 148.9           |
| N47-H47B...S5 <sup>iii</sup> | 0.90        | 2.79          | 3.632(6)      | 156.4           |
| N61-H61A...S6 <sup>v</sup>   | 0.88        | 2.65          | 3.425(7)      | 146.8           |
| N54-H54...S1 <sup>v</sup>    | 0.88        | 2.68          | 3.459(6)      | 147.2           |
| C52-H52A...N3 <sup>vii</sup> | 0.99        | 2.47          | 3.425(6)      | 161.9           |
| N67-H67B...N2 <sup>vi</sup>  | 0.89        | 2.26          | 3.150(4)      | 176.2           |
| N67-H67A...S4 <sup>iv</sup>  | 0.89        | 2.61          | 3.393(5)      | 144.5           |
| N64-H64...S2 <sup>iv</sup>   | 0.89        | 2.64          | 3.512(7)      | 167.3           |

Note: Symmetry codes for **1**: (i)  $3/2-x, 1-y, 1/2+z$ ; for **2**: (i)  $1/2-x, -1/2+y, 1/2-z$ ; (ii)  $1/2-x, 1/2+y, 1/2-z$ ; (iii)  $-1/2+x, 1/2-y, 1/2+z$ ; (iv)  $1/2+x, 1/2-y, 1/2+z$ ; (v)  $3/2-x, -1/2+y, 1/2-z$ ; (vi)  $1-x, -y, 1-z$ ; for **3**: (i)  $1-x, -1/2+y, 3/2-z$ ; (ii)  $1+x, Y, z$ ; (iii)  $3/2-x, 1-y, 1/2+z$ ; (iv)  $-1/2+x, 1/2-y, 1-z$ ; (v)  $1/2-x, 1-y, -1/2+z$ ; (vi)  $-1+x, y, z$ ; (vii)  $-x, 1/2+y, 3/2-z$ .

**Table S6.** Summary of Shape analysis for complexes **2** and **3**

| <b>Complex 2</b>        |        |        |                               |       |        |
|-------------------------|--------|--------|-------------------------------|-------|--------|
| <b>HP-6</b>             | 1      | D6h    | Hexagon                       |       |        |
| <b>PPY-6</b>            | 2      | C5v    | Pentagonal pyramid            |       |        |
| <b>OC-6</b>             | 3      | Oh     | Octahedron                    |       |        |
| <b>TPR-6</b>            | 4      | D3h    | Trigonal prism                |       |        |
| <b>JPPY-6</b>           | 5      | C5v    | Johnson pentagonal pyramid J2 |       |        |
| <b>Structure [ML6 ]</b> | HP-6   | PPY-6  | OC-6                          | TPR-6 | JPPY-6 |
| <b>Cd1</b>              | 32.066 | 20.789 | 4.273                         | 8.578 | 24.022 |
| <b>Complex 3</b>        |        |        |                               |       |        |
| <b>P-6</b>              | 1      | D6h    | Hexagon                       |       |        |
| <b>PPY-6</b>            | 2      | C5v    | Pentagonal pyramid            |       |        |
| <b>OC-6</b>             | 3      | Oh     | Octahedron                    |       |        |
| <b>TPR-6</b>            | 4      | D3h    | Trigonal prism                |       |        |
| <b>JPPY-6</b>           | 5      | C5v    | Johnson pentagonal pyramid J2 |       |        |
| <b>Structure [ML6 ]</b> | HP-6   | PPY-6  | OC-6                          | TPR-6 | JPPY-6 |
| <b>Cd1</b>              | 32.142 | 14.525 | 9.004                         | 7.255 | 17.426 |
| <b>Cd2</b>              | 33.408 | 14.364 | 6.921                         | 6.834 | 18.021 |
| <b>Cd3</b>              | 33.477 | 16.586 | 6.355                         | 6.352 | 20.554 |
